# Supplementary material
Source: PubMed Central journal article supplement (PMC3768104)
Supplement: 0b156a33a716351543ec095d1cc5b6b8_I_Appendix--Human_SLC4_protein_sequence_alignments.pdf [file 0b156a33a716351543ec095d1cc5b6b8_I_Appendix--Human_SLC4_protein_sequence_alignments.pdf]

# Appendix I

## Annotated protein sequence alignments of human SLC4s (see Figures 3 and 15)

This appendix includes two sequence alignments. **Alignment 1** compares the protein sequences of example variants of all ten human SLC4s. Note that AE4 and BTR1 include unusual sequence that can complicate alignment of the remaining 8 SLC4s in some regions, thus we align the AEs and NCBTs without AE4 and BTR1 in **Alignment 2**. Both **Alignments 1** and **2** display the putative positions of transmembrane spans (gray shaded areas), substantial extracellular loops (ELs), putative glycosylation sites (dark green shaded motifs), conserved cysteines in EL3 (C), lysine residues in TM5 that form a DIDS-interaction site in some SLC4s (K), NBCe1 residues substituted in proximal renal tubular acidosis (X), splice cassettes (yellow=cassette I, cyan=cassette II, green=cassette A, blue=cassette II). **Alignment 2** displays, in addition, the boundaries of NCBT subdomains defined in the review and depicted in Figure 15. Sequence accession numbers are provided in Appendix IV.

### Alignment 1. Clustal W alignment of human SLC4 proteins sequences.

```
AE2a      MSSAPRRPAKGADSFCTPEPESLGPGTGFPEQEEDELHRTLGVVERFEEILQEAGSRGGE 60
bAE3      MANGVIPPPGGASPLPQVRVPLEEPPPLSPDVEEEDDDLGKTLAVSRFGDLISKPPAWDPE 60
eAE1      -----
NBCe1-A   -----
NBCe2-c   -----
AE4       -----
NDCBE-A   -----
NBCn2-B   -----
NBCn1-D   -----
BTR1      -----

AE2a      EPGRSYGEEDFEYHRQSSHHIHHPLSTHLPPDARRRKTQGPGRKPRRR-----PGASPT 115
bAE3      KPSRSYSERDFEFHRHTSHHTHHPLSARLPPPHKLRRLLPPTSARHTRRKRKKEKTSAPPS 120
eAE1      -----
NBCe1-A   -----
NBCe2-c   -----
AE4       -----
NDCBE-A   -----
NBCn2-B   -----
NBCn1-D   -----
BTR1      -----MSQV 4
```

AE2a GETPTIEEGEEDDEASEAEGARALTQPSVSTPSSVQFFLQEDDSADRKAERTSPSSPA 175  
 bAE3 EGTPTPIQEEGAGVDEEEEEEEEGESEAEPEVPPHSGTTPQAKKFSIGSDEDDSPGLPG 180  
 eAE1 -----MEELQDDYEDMMEENLEQEYEDPDIPESQMEEPAHADTEATATDYHTTSHPG 53  
 NBCe1-A -----MSTENVEGKPSNLGERGRARSSTFLRVVQPMFN----- 33  
 NBCe2-c -----MKVKEEKAGVGLDHTNHRFRFPDQKECPPIHIGLPVPTYPQRKTDQKGHLSGLQ 55  
 AE4 ---MEMKLPQEGFEASSAPRNIPSGELDSNPDPGTGSPDGPSTESKELG----- 49  
 NDCBE-A -MPAAGSNEPDGVLQSYQRDEEAVVDQGGTSTILNIHYEKEELEGHRTLYVGVRMPLG-R 58  
 NBCn2-B -MEIKDQGAQMEPLLPTRNDEEAVVDRGGTRSIKTHFEKEDLEGHRTLFIVGHVPLGGR 59  
 NBCn1-D -MEADGAGEQMRPLLTRGPDEEAVVDLGTSTSTVNTKFEKEELESRAVYIGVHVPPFS-K 58  
 BTR1 GGRGDRCTQEVQGLVHGAGDLSASLAENSPTMSQNGYFEDSSYYKCDTDDTFEAREEILG 64

AE2a PLPHQEATPRASKGAQAGTQVEEAEAEAVAVASGTAGDDGGASGRPLPKAQPGHRSYNL 235  
 bAE3 RAAVTKPLPSVGPHTDKSPQHSSSSPSRARASRLAGEKS-----RPWSPSASYDL 231  
 eAE1 -----  
 NBCe1-A -----HSIFTSAVSPAA----- 45  
 NBCe2-c KVHWGLRPDQPQQELTGPFGSGASSQDSSMDLISRTRSPAA----- 95  
 AE4 -----VPKDPLLFILQ----- 60  
 NDCBE-A QSHRHRTHGQKHRRRGRGKGASQGEGLALAHDTSPQR----- 98  
 NBCn2-B KSHRHRHRGHKHKRDRER-DSGLEDRSPSFDTPSQR----- 98  
 NBCn1-D ESRRHRHRGHKHHRRRKDKESDKEDGRESPTSQYDTPSQR----- 98  
 BTR1 -----

AE2a QERRRIGSMTGAEQALLPRVPTDEIEAQTLATADLDMKSHRFEDVPGVRRHLVVRKNAKG 295  
 bAE3 RERLCPGSALGNPQGGPEQQVPTDEAEAQMLGSADLDMKSHRLEDNPGVRRHLVVKPSRT 291  
 eAE1 -----  
 NBCe1-A -----  
 NBCe2-c -----  
 AE4 -----  
 NDCBE-A -----  
 NBCn2-B -----  
 NBCn1-D -----  
 BTR1 -----

AE2a STQSGREGREPPTPRARPR--APHKPHEVFVELNELLLD-KNQEPQWRETARWIKFEED 352  
 bAE3 QGGRGSPSGLAPILRRKKKKKLDLRRPHEVFVELNELMLD-RSQEPHWRETARWIKFEED 350  
 eAE1 -----THKVYVELQELVMDEKNQELRWMEARWVQLEEN 87  
 NBCe1-A -----ERIRFILGEEDDSPAPPQLFTELDELAV-DGQEMEWKETARWIKFEED 93  
 NBCe2-c -----EQLQDILGEEDEAPNP--TLFTEMDTLQH-DGDQMEWKESARWIKFEED 141  
 AE4 -----NELLGWPQALEWRETGSSASLLLDMGEM-PSITLSTHLHHRWVLFEEK 108  
 NDCBE-A -----VQFILGTEED-EEHVPHELFTLDEICMK-EGEDAWEWKETARWLKFEED 145  
 NBCn2-B -----VQFILGTEEDDEEHIPHLDFTELDEICWR-EGEDAWEWKETARWLKFEED 146  
 NBCn1-D -----VQFILGTEEDDEEHIPHLDFTEMDLICYR-DGEEYEWKETARWLKFEED 146  
 BTR1 -----DEAFDTANSSIVSGESIRFFVNVNLEMQATNTENEATSGGCV 106

AE2a VEEETERWGKPHVASLSFRSLELRRTLAHGAVLLDLDQQTLPQVAHQVVEQMVISDQIK 412  
 bAE3 VEEETERWGKPHVASLSFRSLELRRTLAHGAALLDLEQTTLPGIAHLVVTMIVSDQIR 410  
 eAE1 LGEN-GAWGRPHLSHLTFWSLLELRRVFTKGTVLLDLQETSLAGVANQLLDRFIFEDQIR 146  
 NBCe1-A VEQGERWSKPHVATLSLHSLFELRTECMEKGSIMLDREASSLPQLVEMIVDHIETGLLK 153  
 NBCe2-c VEEGERWSKPHVSTLSLHSLFELRTECMTGTGTVLLDLDLDSGLPQIIDVIEKQIEDGLLR 201  
 AE4 LEVAAGRWSAPHVPTLALPSLQKLRSLLAEGVLVLLDCAQSLELVEQVTRVESLS---- 164  
 NDCBE-A VEDGGERWSKPYVATLSLHSLFELRSCILNGTVLLDMHANSIEEISDLILDQOELSSDLN 205  
 NBCn2-B VEDGGERWSKPYVATLSLHSLFELRSCILNGTVLLDMHANTLEEIADMVLDQQVSSGQLN 206  
 NBCn1-D VEDGDRWSKPYVATLSLHSLFELRSCILNGTVMLDMRASTLDEIADMVLDNMIASGQLD 206  
 BTR1 LLHTSRKYLKLNFKKEIRAHRDLDGFLAQASIVLNETATSLDNVLRMTLRRFARDPNN 166  
 : : : : .\* : . \*\*: : : :

**Cassette I**

|         |                                                              |     |
|---------|--------------------------------------------------------------|-----|
| AE2a    | AEDRANVLRALLLKHSHPSDEKD-FSFPRNISAGSLGSLLGHHHGQGAESDPHVTEPLMG | 471 |
| bAE3    | PEDRASVLRLLLLKHSHPNDDKDSGFFPRNPSSSSMNSVLGNHHPTPSHGPDGAVPTMAD | 470 |
| eAE1    | PQDREELLRALLLKHSHAG-----ELEALGGVKPAVLTRS                     | 181 |
| NBCe1-A | PELKDKVTYTLRKRHRHQTKK-----SNLRSLADIGKTVSSASRMFTNPDNGSPAMTHR  | 207 |
| NBCe2-c | PELRERVSVLLRRRHRHQTKK-----PIHRSLADIGKSVSTTNRSPARSPGAGPSLHHS  | 255 |
| AE4     | PELRGQLQALLLQRPQHYNQT-----TGTRPCWGS-----                     | 194 |
| NDCBE-A | DSMRVKVREALKKHHHQNEKKRNLIPIVRSFAEVGKKQSDPHLMDKHGQTVSPQSVPT   | 265 |
| NBCn2-B | EDVRRHVHEALMKQHHHQKLLTNRIPVRSFADIGKKQSEPNMDKNAGQVVSQASAP     | 266 |
| NBCn1-D | ESIRENVREALKRHHHQNEKRFTSRIPVRSFADI GKKHSDPHLLERN GEGLSASRHSI | 266 |
| BTR1    | EPNCNLDLLMAMLFDTAGAPMRG-----                                 | 189 |

:

**Cassette II**

|         |                                                             |     |
|---------|-------------------------------------------------------------|-----|
| AE2a    | GVPETRLEVERERE-----                                         | 485 |
| bAE3    | DLGEPAPLWPHDPD-----                                         | 484 |
| eAE1    | GDPSQPLLPQHSSL-----                                         | 195 |
| NBCe1-A | -----                                                       |     |
| NBCe2-c | TEDLRMRQSANYGR-----                                         | 269 |
| AE4     | -----                                                       |     |
| NDCBE-A | TNLEVKNGVNCES-----                                          | 279 |
| NBCn2-B | ACVENKNDVSRENS-----                                         | 280 |
| NBCn1-D | RTGLSASNLSLRGESPLSLLGHLLPSSRAGTPAGSRCTTPVPTPQNSPPSSPSISRLTS | 326 |
| BTR1    | -----                                                       |     |

|         |                                                              |     |
|---------|--------------------------------------------------------------|-----|
| AE2a    | -----                                                        |     |
| bAE3    | -----                                                        |     |
| eAE1    | -----                                                        |     |
| NBCe1-A | -----                                                        |     |
| NBCe2-c | -----                                                        |     |
| AE4     | -----                                                        |     |
| NDCBE-A | -----PVDL                                                    | 283 |
| NBCn2-B | -----TVDF                                                    | 284 |
| NBCn1-D | RSSQKSQRQAPELLVSPASDDIPTVVIHPPEEDLEAALKGEEQKNEENVDLTPGILASPO | 386 |
| BTR1    | -----                                                        |     |

**Cassette A**

|         |                                                                |     |
|---------|----------------------------------------------------------------|-----|
| AE2a    | -----LPPPAPPAGITRKSKEHELKLEKIPENAEATVVLVGCVEFLSR               | 529 |
| bAE3    | -----AKEKPLHMPGGDGHGKSLKLEKIPEDAEATVVLVGCVPFLEQ                | 528 |
| eAE1    | -----ETQLFCEQGDGGTEGHSPSGILEKIPDSEATLVLVGRADFLEQ               | 239 |
| NBCe1-A | -----NLTSSSLNDISDKPEKDQLKKNFKMKLPRDAEASNVLVGEVDFLDT            | 253 |
| NBCe2-c | -----LCHAQSRSMNDISLTPNTDQRKNKFMKKIPKDSEASNVLVGEVDFLDQ          | 317 |
| AE4     | -----THPRKASDNEEAPLREQQNPLRQKLPPGAEAGTVLAGELGFLAQ              | 239 |
| NDCBE-A | SK-----VDLHFMKKIPTGAEASNVLVGEVDILDR                            | 313 |
| NBCn2-B | SKGLGGQKQGHGHTSPCGMKQRHEKGP HQERE VDLHFMKKIPPGAEASNVLVGELEFLDR | 344 |
| NBCn1-D | SAPGNLDNSKSGEIKGNSSGGSRENSTVDFSKVDMNFMRKIPTGAEASNVLVGEVDFLER   | 446 |
| BTR1    | -----KVHLLSDTIQGVATVTVGVRYQQSWLCCIICTMKA                       | 223 |

.

|         |                                                                |     |
|---------|----------------------------------------------------------------|-----|
| AE2a    | PTMAFVRLREAVELDAVLEVPVVRFLFLLLGPP--SSANMDYHEIGRSISTLMSDKQFHE   | 587 |
| bAE3    | PAAAFVRLNEAVLLESVLEVPVVRFLFVMLGPP--SHTSTDYHELGRSIATLMSDKLFHE   | 586 |
| eAE1    | PVLGFVRLQEAEELEAVELP-VPIRFLFVLLGPP--EAPHIDYTLQGRAAATLMSERVFRI  | 296 |
| NBCe1-A | PPIAFVRLQAVMLGALTEVPVPTRFLLFILLGPP--K GKAKSYHEIGRAIATLMSDEVFHD | 311 |
| NBCe2-c | PPIAFVRLIQSAMLGGVTEVPVPTRFLLFILLGPP--SGRAKSYNEIGRAIATLMVDDLFS  | 375 |
| AE4     | PLGAFVRLRNPVVLGSLTEVSLPSRFFCLLLGPP--CMLGKGYHEMGRAAAVLLSDPQFQW  | 297 |
| NDCBE-A | PIVAFVRLSPAVLLSGLTEVIPTRFLFILLGPP--VGKQQYHEIGRSMATIMTDEIFHD    | 371 |
| NBCn2-B | TVVAFVRLSPAVLLQGLAEVIPTRFLFILLGPP--LGKQQYHEIGRSIATLMTDEVFHD    | 402 |
| NBCn1-D | PIIAFVRLAPAVLLTGLTEVPVPTRFLLFLLLGPP--AGKAPQYHEIGRSIATLMTDEIFHD | 504 |

BTR1 LQKRHVCISRLVLRPQNWGENSCEVRFVILVLAPPKMKSTKTAMEVARTFATMFSDIARFQ 283  
 . \* : . \*\* . : \* . : : \* : : : : \*

AE2a AAYLADEREDLLTAINAFLDCSVLPPEVQGEELLRSVAHFQRMKREEQGRLLPTG 647  
 bAE3 AAYQADDRQDLLSAISEFLDGSIVIPPEVEGRDLLRSVAAFQRELLRKRREEQTKVEM 646  
 eAE1 DAYMAQSRGELLHSLEGLDCLSLVLPPTDAPSEQALLSLVPVQRELLRRRYQSSPAKPS 356  
 NBCe1-A IAYKAKDRHDLIAGIDFLDEVIVLPPGEWDPAIRIEPPKSLPSSDKRKNMYSGGENVQM 371  
 NBCe2-c VAYKARNREDLIAGIDFLDEVIVLPPGEWDPNIRIEPPKVPVSADKRSVFSLAELGQM 435  
 AE4 SVRRASNLHDLAALDAFLLEEVTVLPPGRWDPTARIPPPCKLPSQHKRLPSQQREIRGPA 357  
 NDCBE-A VAYKAKERDDLLAGIDFLDQVTVLPPGEWDPISIRIEPPKNVPSQEKRMKMPGVPNGNVCH 431  
 NBCn2-B VAYKAKDRNDLVSGIDFLDQVTVLPPGEWDPISIRIEPPKNVPSQEKRKIPAVPNGTAAH 462  
 NBCn1-D VAYKAKDRNDLLSGIDFLDQVTVLPPGEWDPISIRIEPPKSVPSQEKRKIPVFHNGSTPT 564  
 BTR1 KLETRTEEEFKEALVHQRLTMTVSHGVPAPRTKERSTVSLPAHRHPEPPKCKDFVVPFG 343  
 : : : : : :

AE2a AGLPEKSAQDKALLQMVAAAGAA-----E-DDPLRRTGRPF 682  
 bAE3 TTRGGYTAPGKELSLELGGSEAT-----PEDDPLRRTGSVF 682  
 eAE1 SFYKGLDLNGG-----PDDPLQQTGQLF 379  
 NBCe1-A NGDTPHDGGHGGGGHG-----DCEELQRTGRFC 399  
 NBCe2-c NGSVGGGGGAPGGGNGGGGGGGSGGGAGSGGAGGTSSGDDGEMPAMHEIGEELIWTGRFF 495  
 AE4 VPRLTSAEDRHRHGPHAHS-----PELQRTGRLF 386  
 NDCBE-A IEQEP--HGGHS-----GPQLQRTGRLF 452  
 NBCn2-B GEAEP--HGGHS-----GPQLQRTGRIF 483  
 NBCn1-D LGETPKEAHHA-----GPQLQRTGRLF 587  
 BTR1 -----

Nt TM1

AE2a GGLIRDVRRRYPHYLSDFRDALD-----PQCLAAVIFYFAALSPAITFGGLLGEKTQD 736  
 bAE3 GGLVRDVRRRYPHYPSDLRDALH-----SQCVAAVIFYFAALSPAITFGGLLGEKTEG 736  
 eAE1 GGLVRDIRRRYPYLSDITDAFS-----PQVLAAVIFYFAALSPAITFGGLLGEKTRN 433  
 NBCe1-A GGLIKDIKRKAPFFASDFYDALN-----IQALSAILFIYLATVTNAITFGGLLGDATDN 453  
 NBCe2-c GGLCLDIKRKLPWFPSDFYDGFH-----IQSISAILFIYLCITNAITFGGLLGDATDN 549  
 AE4 GGLIQDVRKVPWYPSDFLDALH-----LQCFSAVLYIYLATVTNAITFGGLLGDATDG 440  
 NDCBE-A GGLVLDIKRKAPWYWSYRDALS-----LQCLASFLFLYCACMSPVITFGGLLGEATEG 506  
 NBCn2-B GGLILDIKRKAPYFWSDFRDAFS-----LQCLASFLFLYCACMSPVITFGGLLGEATEG 537  
 NBCn1-D GGLILDIKRKAPFFLSDFKDALS-----LQCLASILFLYCACMSPVITFGGLLGEATEG 641  
 BTR1 KGIREDIARRFPLYPLDFDTDGIIGKNKAVGKYITTTFLYFACLPLTIAFGSLNDENTDG 403  
 \* : \* : \* : \* : \* \* : : : : \* : : \* : \* : \* : \*

TM2 TM3 TM4

AE2a LIGVSELIMSTALQGVVFCLLGAQPLLVIGFSGPLLVFEEAFFSFCSSNHLEYLVGRVWI 796  
 bAE3 LMGVSELIVSTAVLGVLFSLGAQPLLVVGFSGPLLVFEEAFFKFCRAQDLEYLTGRVWV 796  
 eAE1 QMGVSELLISTAVQGILFALLGAQPLLVVGFSGPLLVFEEAFFSFCETNGLEYIVGRVWI 493  
 NBCe1-A MQGVLESFLGTAVSGAIFCLFAGQPLTILSS **TG**PVLVFERLLFNFSKDNDFDYLEF **R**LWI 513  
 NBCe2-c YQGVMESFLGTAMAGSLFCLFSGQPLIILSSTGPVILIFEKLLFDFSKGNGLDYMEFRLWI 609  
 AE4 AQGVLESFLGTAVAGAAFCCLMAGQPLTILSSTGPVILVFERLLFSFRDYSLDYLPFRLWV 500  
 NDCBE-A RISAIESLFGASMTGIAYSLFAGQALTIILGSTGPVILVFEKILFKFKCDYALSYSLSRACI 566  
 NBCn2-B RISAIESLFGASMTGIAYSLFGQPLTILGSTGPVILVFEKILFKFKKEYGLSYSLSRASI 597  
 NBCn1-D RISAIESLFGASLTGIAYSLFAGQPLTILGSTGPVILVFEKILYKFCRDYQLSYLSLRSI 701  
 BTR1 AIDVQKTIAGQSIGLLLYALFSGQPLVILLTTAPLALYIQVIRVICDDYDLDFNSFYAWT 463  
 . . : . : \* : . \* : . \* : : : \* : : : : : : : : : : :

TM5

|         |                                                                |     |
|---------|----------------------------------------------------------------|-----|
| AE2a    | GFWLVLALLMVALEGSFLVRFVSRFTQEIFAFLLISLIFIIYETFYKLVKIFQEHPLHGCS  | 856 |
| bAE3    | GLWLVVFLALVAAEGSFLVRYISPFQTQEIFAFLLISLIFIIYETFYKLVKIFTEHPLLPFY | 856 |
| eAE1    | GFWLILLVVLVVAFAEGSFLVRFISRYTQEIFSFLISLIFIIYETFSKLIKIFQDHPHQKY  | 553 |
| NBCe1-A | GLWSAFLCIIILVATDASFLVQYFTRFTEEGFSSLLISFIFIYDAFKKMKIADLYYPINSNF | 573 |
| NBCe2-c | GLHSAVQCLILVATDASFLIKYITRFTEEGFSTLISFIFIYDAIKKMGAFKYYPINMDF    | 669 |
| AE4     | GIWVATFCLVLVATEASVLVRYFTRFTEEGFCALISLIFIFIYDAVGKMLNLTHTYPIQKPG | 560 |
| NDCBE-A | GLWTAFLCIVLVATDASSLVCIYITRFTEEGFASLICIIFIYEAEIKLIHLAETYPIMHS   | 626 |
| NBCn2-B | GLWTATLCIIILVATDASSLVCIYITRFTEEGFASLICIIFIYEAEIKLFELSEAYPINMHN | 657 |
| NBCn1-D | GLWTSFLCIVLVATDASSLVCIYITRFTEEGFAALICIIFIYEAEIKLFDLGETYAFNMPN  | 761 |
| BTR1    | GLWNSFFLALYAFFNLSLVMISLFRKSTEEIIALFISITFVLDVAVKGTVKIFWKYYYGHYL | 523 |

\*: . : \* :: . . \* : \* : . : \* : \* : . :

EL3

|         |                                                               |     |
|---------|---------------------------------------------------------------|-----|
| AE2a    | ASNSSEVDGGENMTWAGAE-----RPTLGGP                               | 881 |
| bAE3    | PP-----EGALEGSL-----DAGLEP                                    | 873 |
| eAE1    | NYN-----                                                      | 556 |
| NBCe1-A | KVGYNTLFSCTCVPDPANLISISNDTTLAPEYLPMSSTDMYHNTTFDWAFLSKKESKYSKY | 633 |
| NBCe2-c | KPNFITTYKCECVAPDTVNTIVFNASAPLAPDT-NASLYNLLNLALDWSLLSKKELSY    | 728 |
| AE4     | SS----AYGCLCQYPGPG----GNESQWIRTRPKDRDDIVSMDLGLINASLLPPPECTRO  | 612 |
| NDCBE-A | QLDHLISLYYCRCTLPENP-----NHTLQYWKDHNIVTAEVHWANLTVSECKEM        | 675 |
| NBCn2-B | DLELLTQYSNCVPEPHNP-----SNGTLKEWRESNISASDI I WENLTVSECKSL      | 706 |
| NBCn1-D | NLDKLTYSNCVCTEPPNP-----SNETLAQWKKDNITAHNISWRNLTVSECKKL        | 810 |
| BTR1    | DDYHTKRTSSLVLSLSGL-----ASLNASLHTALNA                          | 554 |

TM6 TM7

|         |                                                                |     |
|---------|----------------------------------------------------------------|-----|
| AE2a    | NRSLAGQSQGQKPRGQPNTALLSLVLMAGTFFIIAFFLRKFKNSRFFPGRIRRVIGDFGVP  | 941 |
| bAE3    | GSALPPTTEGPPSPRNQPNTALLSLILMLGTFFIIAFFLRKFRNSRFLGGKARRIIGDFGIP | 933 |
| eAE1    | -----VLMVPKPQGPLPNTALLSLVLMAGTFFIFAMMLRKFKNSSYFPGKLRRVIGDFGVP  | 611 |
| NBCe1-A | GGNLVGNNG-----NFVDPITLMSFILFLGTYTSSMALKKFKTSFYFPPTARKLISDFAI   | 689 |
| NBCe2-c | GGRLLGNSC-----KFIPDLALMSFILFFGTYSMTLTLKFKFSRYFPPTKVRALVADFSIV  | 784 |
| AE4     | GGHPRGPGC-----HTVPDIAFFSLLLFLTSFFFAMALKCVKTSRFFPSSVVRKGLSDFSSV | 668 |
| NDCBE-A | HGEFMSGACGHHGYPYTPDVLFWSCILFFTTFILSSTLKTFTKSRYFPTRVRSMSVSDFAVF | 735 |
| NBCn2-B | HGEYVGRACGHDHPYVPDVLFWSVILFFSTVTLATLKQFKTSRYFPPTKVRISVSDFAVF   | 766 |
| NBCn1-D | RGVFLGSAAGHHGYPYIPDVLFWCVILFFTTFFLSSFLKQFKTKRYFPPTKVRSTISDFAVF | 870 |
| BTR1    | SFLASPTELPSATHSGQATAVLSLLIMLGLTLWLGYTLYQFKKSPYLHPCVREILSDCALP  | 614 |

. . : : : \* . : . : \* : . \*

EL4 TM8

|         |                                                                  |     |
|---------|------------------------------------------------------------------|-----|
| AE2a    | IAILIMVLVDYSIE---DITYTQKLSVPSGFSVTAPEKRGWVINPLGKSPFPVWMMVASL     | 998 |
| bAE3    | ISILVMVLVDYSIT---DITYTQKLTVPGLSVTSPDKRSWFIPPLGSARFPPWMMVAAA      | 990 |
| eAE1    | ISILIMVLVDFFIQ---DITYTQKLSVPDGFKVSNSARGWVIHPLGLRSEFPIWMMFASA     | 668 |
| NBCe1-A | LSILIFCVIDALVG----VDTPKLIVPSEFKPTSPN-RGWFVPPFG---ENPWVVCALAA     | 741 |
| NBCe2-c | FSILMFCGIDACFG----LETPLKLVPSVIKPTRPD-RGWFVAPFG---KNPWVYPASI      | 836 |
| AE4     | LAILLGCGLDLAFGL----LATPKLMVPREFKPTLPG-RGWLVSFPFG---ANPWWSVAAA    | 720 |
| NDCBE-A | LTIFTMVIDFLIG----VPSPKLQVPSVFKPTRDD-RGWIINPIG---PNPWWTVIAAI      | 787 |
| NBCn2-B | LTILCMVLIDYAIG----IPSPKLQVPSVFKPTRDD-RGWFVTPLG---PNPWWTVIAAI     | 818 |
| NBCn1-D | LTIVIMVTIDYLVG----VPSPKLHVPEKFEPTHPG-RGWIISPLG---DNPWWTLLIAA     | 922 |
| BTR1    | I AVLAFSLISSHGFR E I E M S-----KFRYNPSESPFAMAQIQSLS-----LRAVSGAM | 662 |

: : . : : . : : :

**TM9**

|         |                                                                |      |
|---------|----------------------------------------------------------------|------|
| AE2a    | LPAILVFLIFMETQITTLII SKKERMLQKSGGFHLDL LLIIVAMGGICALFGLPWLAAT  | 1058 |
| bAE3    | VPALLVLIIFMETQITLIVSQARRLLKSGGFHLDL LLIIGSLGGCLFGLPWLTAAAT     | 1050 |
| eAE1    | LPALLVFLIFLESQITTLIVSKPERKMKVKGSGFHLDL LLVVGMGGVAALFGMPWLSATT  | 728  |
| NBCe1-A | IPALLVTILIFMDQQITAVIVNRKEHKLKKGAGYHLDLFWVAILMVICSLMALPWVYAAAT  | 801  |
| NBCe2-c | LPALLVTILIFMDQQITAVIVNRKENKLKKAAGYHLDLFWVGILMALCSFMGLPWVYAAAT  | 896  |
| AE4     | LPALLSILIFMDQQITAVILNRMEYRLQKGAGFHLDLFCVAVLMLLTSALGLPWVYSAT    | 780  |
| NDCBE-A | IPALLCTILIFMDQQITAVI INRKEHKLKKGCGYHLDL MVAIMLVGCSIMGLPWVFAAT  | 847  |
| NBCn2-B | IPALLCTILIFMDQQITAVI INRKEHKLKKGCGYHLDL MVAIMLVGCSIMGLPWVFAAT  | 878  |
| NBCn1-D | IPALLCTILIFMDQQITAVI INRKEHKLKKGAGYHLDL MVMGVMGLVCSVMGLPWVFAAT | 982  |
| BTR1    | GLGFLLSMLFFIEQNLVAALVNAPENRLVKGTAYHWDL LLLAIINTGLSLFGLPWIHAAY  | 722  |

.:\* :\*: \*:: :.: :. : \* . : \* \*\* : : : . : : \*\* :

|         |                                                               |             |      |
|---------|---------------------------------------------------------------|-------------|------|
|         | <b>TM10</b>                                                   | <b>TM11</b> |      |
| AE2a    | VRSVTHANALTVMSKAVAPGDKPK-IQEVKEQRVTGLLVALLVGLSIVIGDL-LRQIPLA  |             | 1116 |
| bAE3    | VRSVTHVNALTVMRTAIPGDKPQ-IQEVREQRVTGVLIASLVGLSIVMGAV-LRRIPLA   |             | 1108 |
| eAE1    | VRSVTHANALTVMGKASTPGAAAQ-IQEVKEQRISGLLVAVLVGLSILMEPI-LSRIPLA  |             | 786  |
| NBCe1-A | VISIAHIDSLKMETETSAPGEQPK-FLGVREQRVTGTLVFLTGLSVFMAPI-LKFIPMP   |             | 859  |
| NBCe2-c | VISIAHIDSLKMETETSAPGEQPK-FLGVREQRVTGIIIVFILTGISVFLAPI-LKCIPLP |             | 954  |
| AE4     | VISLAHMDSLRRESRACAPGERPN-FLGIREQRLTGLVVFLTGLASIFLAPV-LKFIPMP  |             | 838  |
| NDCBE-A | VLSITHVNSLKLESECSAPGEQPK-FLGIREQRVTGLMIFVLMGCSVFMVAI-LKFIPMP  |             | 905  |
| NBCn2-B | VLSITHVNSLKLESECSAPGEQPK-FLGIREQRVTGLMIFILMGSSVFMVAI-LKFIPMP  |             | 936  |
| NBCn1-D | VLSISHVNSLKVESECSAPGEQPK-FLGIREQRVTGLMIFILMGSLVFMVAI-LKFIPMP  |             | 1040 |
| BTR1    | PHSPLHVRALALVEERVENGHYDITVNVKETRRLTSLGASVLVGLSLLLLPVPLOWIPKP  |             | 782  |

\* \* : \* \* . : : \* \* : . \* \* \* . : : \* \* \* .

|         |                                                                  |             |      |
|---------|------------------------------------------------------------------|-------------|------|
|         | <b>Span 12</b>                                                   | <b>TM13</b> |      |
| AE2a    | VLFGI FLYMGVTSLSNGIQFYERLHL LLMPPKHHDPDVTYVKKVRTLRMHLFTALQLLCLAL |             | 1176 |
| bAE3    | VLFGI FLYMGVTSLSNGIQLSQRLL LILMPAKHHPEQPYPVTKVKTWRMHLFTCIQLGCIAL |             | 1168 |
| eAE1    | VLFGI FLYMGVTSLSNGIQLFDRIL LLLFKPKYHPDVPYVTKVKTWRMHLFTGIQIICLAV  |             | 846  |
| NBCe1-A | VLYGVFLYMGVASLNQVFMDRL KLL LLMPLKHPQDFIYLRHVPLRRVHLFTFLQVLCAL    |             | 919  |
| NBCe2-c | VLYGVFLYMGVASLNQIQFWERCK LFLMPAKHQPDHAFLRHVPLRRIHHLFTLVQILCLAV   |             | 1014 |
| AE4     | VLYGIFLYMGVAALSSIQFTNRV KLL LMPAKHQPDLLLRHVPLTRVHLFTAIQLACLGL    |             | 898  |
| NDCBE-A | VLYGVFLYMGVSSLSQIQFFDR LKLFMGPAKHQPDFIYLRHVPLRKVHLFTLIQLTCLVL    |             | 965  |
| NBCn2-B | VLYGVFLYMGVSSLSKGIQFFDR I KLFWMPAKHQPDFIYLRHVPLRKVHLFTIIQM SCLGL |             | 996  |
| NBCn1-D | VLYGVFLYMGVSSLSKGIQFFDR I KLFMGPAKHQPDLYLRVPLWKVHI FTVIQLTCLVL   |             | 1100 |
| BTR1    | VLYGLFLYIALTSLDGNQLVQRV AL LKKEQTAYPPHYIRRVPQRKIHYFTGLQVQLLLL    |             | 842  |

\*\*:\* :\* : \* : : \* : \* : \* : \* : \* : \* : \* : \* : \* : \* : \* : \* : \* : \* : \* : \*

|         |                                                                       |           |      |
|---------|-----------------------------------------------------------------------|-----------|------|
|         | <b>TM14</b>                                                           | <b>Ct</b> |      |
| AE2a    | LWAVMST---AASLAFPFIL I LTVPLRMVVLTRIFTDREM KCLDANEAEPVFDEREGVDE       |           | 1233 |
| bAE3    | LWVVKST---AASLAFPFLL L LTVPLRHCLLPRLFDRELQALDSEDAEPNFDE-DGQDE         |           | 1224 |
| eAE1    | LWVVKST---PASLALPFVLI LTVPLRRVLLPLIFRNVELQCLDADDAKATFDEEEGRDE         |           | 903  |
| NBCe1-A | LWILKST---VAAIIFPVMILALVAVRK-GMDYLF SQHDSLFLD DVIPEKDKKKKEDEKK        |           | 975  |
| NBCe2-c | LWILKST---VAAIIFPVMILGLI I VRR-LLDFIFSQHDLAWIDN ILPEKEK KETDKRRK      |           | 1070 |
| AE4     | LWI IKST---PAAIIFPMLLGLVGV RK-ALERVFS PQEL L WLDLMP EEERSIPEKGL E     |           | 954  |
| NDCBE-A | LWVIKAS---PAAIIVFPMMV LALVFV RK-VMDLCF SKRELSWLD DDLMP ES KKKKLD DAKK |           | 1021 |
| NBCn2-B | LWI IKVS---RAAIIVFPMMV LALVFV RK-LMDLLFTKRELSWLD DDLMP ES KKKKLEDAEK  |           | 1052 |
| NBCn1-D | LWVIKVS---AAAVFPMMV LALVFV RK-LMDLCFTKRELSWLD DDLMP ES KKKKEDDKKK     |           | 1156 |
| BTR1    | LCAFGMSSLPYMKMIFPLIAMIPIRY ILLPRIIEAKYLDVMDAEHRP-----                 |           | 891  |

\* . : : : \* : : \* : : \* : : \* : : \* : : \* : : \*

Cassette III

|         |                                                              |      |
|---------|--------------------------------------------------------------|------|
| AE2a    | YNEMPMPV-----                                                | 1241 |
| bAE3    | YNELHMPV-----                                                | 1232 |
| eAE1    | YDEVAMPV-----                                                | 911  |
| NBCe1-A | KKKKKGSLDSDNDD-----SDCPYSEKVPSTIKIPMDIMEQQPFLSD              | 1016 |
| NBCe2-c | RKKGAHEDCDEEPQ-----FPPPSVIKIPMESVQSDPQNGIHCIAR               | 1111 |
| AE4     | PEHSFSGDSEDESE-----LMYQPKAPEINISVN-----                      | 983  |
| NDCBE-A | KAKEEEEEAEKMLEIGGDKFPLESRKLLSSPGKNISCRDPSEINISDEMPKTTVWKALSM | 1081 |
| NBCn2-B | EE--EQSMLAMEDEGTVQLPLEG-----HYRDDPSVINISDEMSTALWRNLLI        | 1099 |
| NBCn1-D | KEKEEAERMLQDDDDTVHLPFEGGSLQIPVKALKYSVDPSIVNISDEMAKTAQWKALSM  | 1216 |
| BTR1    | -----                                                        |      |

|         |                                         |      |
|---------|-----------------------------------------|------|
| AE2a    | -----                                   |      |
| bAE3    | -----                                   |      |
| eAE1    | -----                                   |      |
| NBCe1-A | SKPSDRERSPTFLERHTSC-----                | 1035 |
| NBCe2-c | KRSSWSYSL-----                          | 1121 |
| AE4     | -----                                   |      |
| NDCBE-A | NSGNAKEKSLFN-----                       | 1093 |
| NBCn2-B | TADNSKDKESSFPSKSSPS-----                | 1118 |
| NBCn1-D | NTENAKVTRSNMSPDKPVSVKISFEDEPRKKYVDAETSL | 1255 |
| BTR1    | -----                                   |      |

**Alignment 2.** Clustal W alignment of human AE and NCBT proteins sequences, showing NCBT subdomains.

|         |                                                                |     |
|---------|----------------------------------------------------------------|-----|
|         | -----Nt_appendage-----                                         |     |
| NDCBE-A | -----                                                          |     |
| NBCn2-B | -----                                                          |     |
| NBCn1-D | -----                                                          |     |
| NBCe1-A | -----                                                          |     |
| NBCe2-c | -----                                                          |     |
| AE2a    | MSSAPRRPAKGADSFCTPEPEESLPGTGPFFPEQEEDELHRTLGVVERFEEILQEAGSRGGE | 60  |
| bAE3    | MANGVIPPFGASPLPQVRVPLEEPPSPDVEEEDDDLGKTLAVSRFGDLISKPPAWDPE     | 60  |
| eAE1    | -----                                                          |     |
|         | -----Nt_appendage-----                                         |     |
| NDCBE-A | -----MPAAGSNEP                                                 | 9   |
| NBCn2-B | -----MEIKDQGAQ                                                 | 9   |
| NBCn1-D | -----MEADGAGEQ                                                 | 9   |
| NBCe1-A | -----MSTENVE                                                   | 7   |
| NBCe2-c | -----MKVKEEK                                                   | 7   |
| AE2a    | EPGRSYGEEDFEYHRQSSHHIHHPLSTHLPPDARRRKTQGPGRKPRRR-----PGASPT    | 115 |
| bAE3    | KPSRSYSERDFEFHRHTSHHTHHPLSARLPPPHKLRRLPPTSARHTRRKRKKEKTSAPPS   | 120 |
| eAE1    | -----                                                          |     |
|         | -----Nt_appendage-----                                         |     |
| NDCBE-A | DGVLQSYQRPDEEAVVDQGGTSTILNIHYEKEELEGHRTLYVGVRMPLG-RQSHRHRTHG   | 68  |
| NBCn2-B | MEPLLPTRNDEEAVVDRGGTRSRILKTHFEKEDLEGHRTLFIGVHVPLGGRKSHRRHRHRG  | 69  |
| NBCn1-D | MRPLLTRGPDEEAVVDLGGTSSTVNTKFEKEELESRAVYIGVHVPFSS-KESRRRHRHRG   | 68  |
| NBCe1-A | GKPSNLGERGRARSSTFLRVVQPMFN-----                                | 33  |
| NBCe2-c | AGVGKLDHTNHRRRFPDQKECPPIHIGLVPVPTYPQRKTDQKGHLSGLQKVHWGLRPDQPQ  | 67  |
| AE2a    | GETPTIEEGEEDDEDEASEAEGARALTQSPVSTPSSVQFFLQEDDSADRKAERTSPSSPA   | 175 |
| bAE3    | EGTPPIQEEGGAGVDEEEEEEEEEEGESEAEPEPVEPPHSGTPQKAKFSIGSDEDDSPGLPG | 180 |
| eAE1    | -----MEELQDDYEDMMEENLEQEEYEDPDIPESQMEEPAHDTEATATDYHTTSHPG      | 53  |
|         | -----Nt_appendage-----                                         |     |
| NDCBE-A | QKHRRRGRGKGASQGEGLALAH-----                                    | 92  |
| NBCn2-B | HKHRKRDREDSG-LEDGRESFSF-----                                   | 92  |
| NBCn1-D | HKHHHRRRKDKESDKEDGRESFSY-----                                  | 92  |
| NBCe1-A | -----HSIFTSAV-----                                             | 41  |
| NBCe2-c | QELTGPGSGASSQDSSMDLISRTR-----                                  | 91  |
| AE2a    | PLPHQEATPRASKGAQAGTQVEEAEAEAVAVASGTAGGDDGGASGRPLPKAQPGRHSYNL   | 235 |
| bAE3    | RAAVTKPLPSVGPHTDKSPQHSSSSPSPRARASRLAGEKS-----RPWSPSASYDL       | 231 |
| eAE1    | -----                                                          |     |
|         | -----Nt_appendage-----                                         |     |
| NDCBE-A | -----                                                          |     |
| NBCn2-B | -----                                                          |     |
| NBCn1-D | -----                                                          |     |
| NBCe1-A | -----                                                          |     |
| NBCe2-c | -----                                                          |     |
| AE2a    | QERRRIGSMTGAEQALLPRVPTDEIEAQTLATADLDMKSHRFEDVPGVRRHLVRKNAKG    | 295 |
| bAE3    | RERLCPGSALGNPGGPEQVPTDEAEAQMLGSADLDDMKSHRLEDNPGVRRHLVKKPSRT    | 291 |
| eAE1    | -----                                                          |     |



-----Nt\_core\_1-----  
 NDCBE-A -----DTPSQRVQFILGTEED-EEHVPHELFTTELDEICMK-EGEDA EWKETARWLKFEE D 145  
 NBCn2-B -----DTPSQRVQFILGTEDDDEEHI PHDLFTTELDEICWR-EGEDA EWRETARWLKFEE D 146  
 NBCn1-D -----DTPSQRVQFILGTEDDDEEHI PHDLFTTEMDEL CYR-DGEEYEWKETARWLKFEE D 146  
 NBCe1-A -----SPAAERIRFILGEEED--SPAPPQLFTTELDELLAV-DGQEMEWKETARWIKFEE K 93  
 NBCe2-c -----SPAAEQ LQDILGEEDE--APNP--TLFTEM DTLQH-DGDQMEWKESARWIKFEE K 141  
 AE2a STQSGREGREP GPTPRARPR--APHKPHEV FVELNELLLD-KNQEPQWRETARWIKFEE D 352  
 bAE3 QGGRGSPSGLAPILRRKKKKKLD RRPHEV FVELNELMLD-RSQEPHWRETARWIKFEE D 350  
 eAE1 -----THKVYVELQELVMDEKNQELRWMEARWVQLEEN 87  
 . : . : . \* \* : \* \* : \* \* .

-----Nt\_core\_1-----  
 NDCBE-A VEDGGERWSKPYVATLSLHSLFELRSCILNGTVLLDMHANSIEEISDLILDQQELSSDLN 205  
 NBCn2-B VEDGGERWSKPYVATLSLHSLFELRSCILNGTVLLDMHANTLEEIADMVLDQQVSSGQLN 206  
 NBCn1-D VEDGGDRWSKPYVATLSLHSLFELRSCILNGTVMLDMRASTLDEIADMVLDNMIASGQLD 206  
 NBCe1-A VEQGERWSKPHVATLSLHSLFELRSCMEKGSIMLDREASSLPQLVEMIVDHQIETGLLK 153  
 NBCe2-c VEEGGERWSKPHVSTLSLHSLFELRTCLQTGTVLLDLDLSDGSLPQIIDVIEKQIEDGLLR 201  
 AE2a VEEETERW GKP HVASLSFRS LLELRRTLAHGAVLLDLDQQTLPGVAHQVVEQMVISDQIK 412  
 bAE3 VEEETERW GKP HVASLSFRS LLELRRTIAHGAALLDLEQTLPGIAHLVETMIVSDQIR 410  
 eAE1 LGEN-GAWGRPHLSHLTFWSLLELRVFTKGTVLLDLQETSLAGVANQLLDRFIFEDQIR 146  
 : : \* : \* : \* : \* : \* : \* : \* : \* : \* : \*

Cassette I

-----Nt\_core\_1-----Nt\_loop-----  
 NDCBE-A DSMRVK VREALLKKHHH QNEK KRNNLIPIVRSFAEVGKKQSDPHLMDKKGQTVSPQSVPT 265  
 NBCn2-B EDVRRHVHEALMKQH H H QNKKLTNRIPIVRSFADIGKKQSEPN SMDKNAGQV VSPQSAP 266  
 NBCn1-D ESIRENVREALLKRHHH QNEKRFTSRIPVRSFADIGKKHSDPHLLERN GEGLSASRHSL 266  
 NBCe1-A PELKDKVTYTL LRKRRHQTKK-----SNLRSLADIGKTVSSASRMFTNPDNG SPAMTHR 207  
 NBCe2-c PELRERSVYVLLRRRHQTKK-----PIHRSLADIGKSVSTTNRSPARSPGAPSLHHS 255  
 AE2a AEDRANVLRALLLKHSHPSDEKD-FSFP RNI SAGSLGSLLGHHHGQGAESDPHVTEPLMG 471  
 bAE3 PEDRASVLR TLLLKHSHPNDDKDSGFFPRNPSSSSMNSV LGNHHPTPSHGPDGAVPTMAD 470  
 eAE1 PQDREELLRALLLKHSHAG-----ELEALGGVKPAVLTRS 181  
 . : : \* : \* : \*

Cassette II

-----Nt\_loop-----  
 NDCBE-A TNLEVKNGVNCEHS----- 279  
 NBCn2-B ACVENKNDVSRENS----- 280  
 NBCn1-D RTGLSASNLSLRGESPLSLLGHLLPSSRAGTPAGSRCTTPVPTPQNSPSSPSISRLTS 326  
 NBCe1-A -----  
 NBCe2-c TEDLRMRQSANYGR----- 269  
 AE2a GVPETRLEVERERE----- 485  
 bAE3 DLGEPAPLWPHDPD----- 484  
 eAE1 GDPSQPLLPQHSSL----- 195

-----Nt\_loop-----  
 NDCBE-A -----PVDL 283  
 NBCn2-B -----TVDF 284  
 NBCn1-D RSSQKSQRQAPPELLVSPASDDIPTVVIHPPEEDLEAALKGEEQKNEENVDLTPGILASPQ 386  
 NBCe1-A -----  
 NBCe2-c -----  
 AE2a -----  
 bAE3 -----  
 eAE1 -----



-----TM2----- TM3----- EL2-----TM4-----  
 NDCBE-A FGASMTGIAYSLFAGQAL TILGSTGPVLVFEKILFKFCKDYALSYSLSLRACIGLWTATLC 574  
 NBCn2-B FGASMTGIAYSLFGGQPL TILGSTGPVLVFEKILFKFCKEYGLSYLSLRASIGLWTATLC 605  
 NBCn1-D FGASLTGIAYSLFAGQPL TILGSTGPVLVFEKILYKFCRDYQLSYLSLRRTSISGLWTSFLC 709  
 NBCe1-A LGTAVSGAIFCLFAGQPL TILSS TGPVLVFERLLFNFSKDNDFDYLEF R LWIGLWSAFLC 521  
 NBCe2-c LGTAMAGSLFCLFSGQPL ILSSTGPILIFEKLLDFDFSKGNGLDYMEFRLWIGLHSAVQC 617  
 AE2a MSTALQGQVVFCLLGAQPLL VIGFSGPLLVEEAFSFCSSNHLEYLVGRVWVIGFWLWVFLA 804  
 bAE3 VSTAVLGVLFSL LGAQPLL VVGFSGPLLVEEAFKFCRAQDLEYLTGRVWVGLWLVVVF 804  
 eAE1 ISTAVQGI L F ALLGAQPLL VVGFSGPLLVEEAFSFCETNGLEYLVGRVWVIGFWLILLV 501  
 ..::: \* :. \* . . . \* . \* : . : . : \* \* \* : \* \* \* . : : . \* . : . \* : \* : \* :

-----TM5-----  
 NDCBE-A IVLVATDASSLVICYITRFTEEAFASLICI IFIYEAEIEKLIHLAETYP IHMSQLDHLISLY 634  
 NBCn2-B IILVATDASSLVICYITRFTEEAFASLICI IFIYEAELEKLFELSEAYPINMHNLDLELLTQY 665  
 NBCn1-D IVLVATDASSLVICYITRFTEEAFALCIFI IFIYEAELEKLF DLGETYAFNMHNNLDKLTYS 769  
 NBCe1-A IILVATDASFLVQYFTRFTEEFGSSLSIF IFIYDAFKKMI K LADYYPINSNFKVGYNLTF 581  
 NBCe2-c LILVATDASFI IKYITRFTEEFGSTLISF IFIYDAIKKMI GAFKYYPINMDFKPNFITTY 677  
 AE2a LLMVALEGSFLVRFVSRFTEQIFAF LSLISLIF IYETFYKLVKIFQEHPLHGCSAS NSSEVD 864  
 bAE3 LALVAAEGSFLVRYISPTEQIFAF LSLISLIF IYETFYKLYKVFTEHPLLPFYPP----- 858  
 eAE1 VLVVAFEGSFLVRFISRTEQIF SFLISLIF IYETFSKLIKIFQDHP LQKTYNYN----- 556  
 : : \* \* : . \* : : : : \* \* \* \* : \* \* : \* \* : \* \* : \* : : : : : : : :

-----EL3-----  
 NDCBE-A YCRCTLPENP ---NNH LQYWKDH-NIV-----TAEVHWANLTVSE QEMHGFEFMGSA 683  
 NBCn2-B SCNCVEPHNP ---SNGTLKEWRES-NIS-----ASDIWENLTVSE CKSLHGEYVGRA 714  
 NBCn1-D SCVCTEPPNP ---SNETLAQWKKD-NIT-----AHNIS --WRNLTVSE CKKLRGVFLGSA 818  
 NBCe1-A SCTCVPDPANIS ISNDTLAPEYLP TMSSTDMYHNTTFDWAFLSKKE CKSKYGGNLVGN 641  
 NBCe2-c KCECVAPDTVNTTVFNASAPLAPDT-NASLYNLLNLALDWSLLSKKE CLSYGGRLGNS 736  
 AE2a GGENMTWAGA-----RPTLGPGNRS LAGQS 889  
 bAE3 --EGALEGSL-----DAGLEPNCSALPTE 881  
 eAE1 -----VLM 559

-----TM6----- TM7-----  
 NDCBE-A CGHHGPHYTPDVLFWSCILFFTTFILSSTLKT FFKTSRYFPTRVRS MVSDFAVFLTIFTMVI 743  
 NBCn2-B CGHDHPYVPDVLFWSVILFFSTVTLSATLKQFKTSRYFP TKVRSIVSDFAVFLTILCMVL 774  
 NBCn1-D CGHHGPHYIPDVLFWCVILFFTTFFLSSFLKQFKTKRYFP TKVRSTISDFAVFLTIVIMVT 878  
 NBCe1-A C---NFVPDITLMSFILFLGTYTSSMALKKFKTSPYFP TARKLISDFAIILSILIFCV 697  
 NBCe2-c C---KFIPDLALMSFILFFGTYSMTLTLKFKFSRYFP TKVRALVADFSIVFSILMFCG 792  
 AE2a GQKPRGQPNTALLSLVLMAGTFFIAFFLRKFKNSRFP GRIRRVIGDFGVP IAILIMVL 949  
 bAE3 GPPSPRNQPNTALLSLILMLGTFFFIAFFLRKFRNSRFLGGKARRIIGDFGVP ISILMVL 941  
 eAE1 VPKPQGPLPNTALLSLVLMAGTFFFAMMLRKFKNSSYFP GKLRRVIGDFGVP ISILIMVL 619  
 \* : : . : \* : \* : \* : \* : \* : \* : \* : \* : \* : \* : \* : \* :

-----EL4----- TM8-----  
 NDCBE-A IDFLIG-VPSPKLQVPSVFKPTRDD-RGWIINPIG ---PNPWWTVIAAIIPALLCTILIF 798  
 NBCn2-B IDYAIG-IPSPKLQVPSVFKPTRDD-RGWVFTPLG ---PNPWWTVIAAIIPALLCTILIF 829  
 NBCn1-D IDYLVG-VPSPKLHVPEKFEPTHPE-RGWIISPLG ---DNPWWTLLIAAIIPALLCTILIF 933  
 NBCe1-A IDALVG-VDTPKLIVPEFQKPTSPN-RGWVFPFG ---ENPWVCLAAAIPALLVTILIF 752  
 NBCe2-c IDACFG-LETPKLHVPSVIKPTRPD-RGWVAPFG ---KNPWVYPASILPALLVTILIF 847  
 AE2a VDYSIEDTYTQKLSVPSGFSVTAPEKRGWVINPLGKSPFPV WMMVASLLPAILVFILIF 1009  
 bAE3 VDYSITDITYTQKLTVP TGLSVTSPDKRSWFIPPLGSARFPFP WMMVAAAVPALLVLILIF 1001  
 eAE1 VDFFIQDITYTQKLSVDPGFKVSNSSARGWVIHPLGLRSEFFI WMMFASALPALLVIFILIF 679  
 : \* : : \* \* \* : : : . \* . : : \* \* : \* \* : \* \* : \* \* : \* \* : \* \* :

-----TM9-----  
 NDCBE-A MDQQITAVI INRKEHKLKKGCGYHLDLMLVAIMLVGCSIMGLPWFVAATVLSITHVNSLK 858  
 NBCn2-B MDQQITAVI INRKEHKLKKGCGYHLDLMLVAVMLGVCSIMGLPWFVAATVLSITHVNSLK 889  
 NBCn1-D MDQQITAVI INRKEHKLKKGAGYHLDLMLVGVMLGVCSVMGLPWFVAATVLSISHVNSLK 993  
 NBCe1-A MDQQITAVI VNRKEHKLKKGAGYHLDLFWVAI LMVICSLMALPWPYV AATVISIAHIDS LK 812  
 NBCe2-c MDQQITAVI VNRKENKLLKKAAGYHLDLFWVGILMALCSFMGLPWPYVAATVISIAHIDS LK 907  
 AE2a METQITTTLIISKERMLQKGSFHLDLLLIVAMGGICALFGLPWLAAATVRSVTHANALT 1069  
 bAE3 METQITALIVSQARRLLKGSFHLDLLLIGSLGGLCGLFGLPWLTAATVRSVTHVNALT 1061  
 eAE1 LESQITTLIVSKPERKMKVKGSGFHLDLLLVVGMGGVAALFGMPWLSA TTVRSVTHANALT 739  
 ::\*\*\*::\*::: : : \*..\*::\*\*\*: : : : : : : : \* : \* \* : \* : \* : \*

-----TM10----- -----TM11-----  
 NDCBE-A LESECSAPGEQPKFLGIREQRVTGLMIFVLMGCSVFM TAILKFI PMPVLYGVFLYMGVSS 918  
 NBCn2-B LESECSAPGEQPKFLGIREQRVTGLMIFILMGSSVFM TSI LKFI PMPVLYGVFLYMGVSS 949  
 NBCn1-D VESECSAPGEQPKFLGIREQRVTGLMIFILMGSLVFM TSVLKFIPMPVLYGVFLYMGVSS 1053  
 NBCe1-A METETSAPGEQPKFLGVREQRVTGTLVFI LTGLSVFM APILKFI PMPVLYGVFLYMGVAS 872  
 NBCe2-c METETSAPGEQPKFLGVREQRVTGII VFI LTGISVFLAPILKCI PLPVLVLYGVFLYMGVAS 967  
 AE2a VMSKAVAPGDKPKIQEVKEQRVTGLL VALLVGLSIVIGDL LRQIPLAVLFGIFLYMGVTS 1129  
 bAE3 VMRTAIAPGDKPKIQEVREQRVTGVL IASLVGLSIVMGAVL RRIPLAVLFGIFLYMGVTS 1121  
 eAE1 VMGKASTPGAAAQIQEVKEQRISGLL VAVLVGLSILMEPILSRI PLAVLFGIFLYMGVTS 799  
 : : \*\* : : : : : \* \* : : : \* : \* : \* : \* : \* : \* : \*

-----Span 12----- -----TM13-----  
 NDCBE-A LQGIQFFDR LKLF GMPAKHQPDFIYLRHVPLRKVHL FT LIQLTCLVLLWVIKASPA AIVF 978  
 NBCn2-B LKGIQFFDR I KLF WMPAKHQPDFIYLRHVPLRKVHL FT I IQMSCLGLLWI IKVSRA AIVF 1009  
 NBCn1-D LKGIQLFDR I KLF GMPAKHQPDFIYLRVPLWKVHI FT VIQLTCLVLLWVIKVSAA AIVF 1113  
 NBCe1-A LNGVQFMD LK LLLMPLKHQPDFIYLRHVPLRRVHL FT FLQVLC LALLWILKSTVAA IIF 932  
 NBCe2-c LNGIQFWERCKLFLMPAKHQPDHAF LRHVPLRRIH LFTLVQILCLAVLWILKSTVAA IIF 1027  
 AE2a LNGIQFYERLHLLMPPKHHPDVTYVKKVRTLRMH LFTALQLLCLALLWAVMSTAASLAF 1189  
 bAE3 LSGIQLSQRL LLILMPAKHHPQPYVTKVKTWRMH LFTCIQLGCIALLWVVKSTAASLAF 1181  
 eAE1 LSGIQLFDR I LLLFKPPKYHPDVYVKKRVTWRMH LFTGIQIICLAVLWVVKSTPASLAL 859  
 \* . : : \* : : \* : : : : : \* : : : \* : : \* : : \* : : : : : \* : : : \*

-----TM14----- -----Ct\_core-----  
 NDCBE-A PMMV LALV FVRK - VMDLCFSKRELSWL DDLMPESK KKKLDDAKKKAKEEEEEAEKMLEIGG 1037  
 NBCn2-B PMMV LALV FVRK - LMDLLFTKRELSWL DDLMPESK KKKLEDAEKEE - EQSMLAMEDEGT 1066  
 NBCn1-D PMMV LALV FVRK - LMDLCFTKRELSWL DDLMPESK KKKEDDKKKKEEAEERMLQDDDDT 1172  
 NBCe1-A PVMILALVAVRK - GMDYLF SQHDLSFLDDVI PEKDKKKKEDEK KKKKKGSLDSNDND - 989  
 NBCe2-c PVMILGLIIVRR - LLDFIF SQHDLAWIDN ILPEKEKKE TDKKRRKKG AHEDCDEEPQ - 1084  
 AE2a PFI LILT VPLRMV LTRIF TDREM KCLDANAE PVFDEREGVDEYNEM PMPV - 1241  
 bAE3 PFL LLLT VPLRHCLL PRL FQDREL QALDSEDAEPNFDE - DGQDEYNELHMPV - 1232  
 eAE1 PFL LILT VPLRRVLLPLIFRNVELQCLDADAKATFDEEEGRDEYDEVAMPV - 911  
 \* . : : \* : : \* : : : : \* : : : \* : : : : \* : : : \*

Cassette III

-----Ct\_appendage-----  
 NDCBE-A DKFPLESRKLLSSPGKNISCRCDPSEINISDEMPKTTVWKALSMNSGNAKEKSLFN --- 1093  
 NBCn2-B VQLPLEG --- HYRDDPSVINISDEMSKTALWRNLLITADNSKDKESSFSPKS 1115  
 NBCn1-D VHLPFEGGSL LQIPVKALKYS V DPSVINISDEMAKTAQWKALSMNTENAKVTRSNMSPDK 1232  
 NBCe1-A --- SDCPYSEKVPSIKIPMDIMEQQPFLSDSKPSDRERSPTFL 1029  
 NBCe2-c --- FPPPSVIKIPMESVQSDPQNGIHCIAKRSSWSYSL --- 1121  
 AE2a ---  
 bAE3 ---  
 eAE1 ---

|         | ---Ct_appendage-----    |      |
|---------|-------------------------|------|
| NDCBE-A | -----                   |      |
| NBCn2-B | SPS-----                | 1118 |
| NBCn1-D | PVSVKISFEDEPRKKYVDAETSL | 1255 |
| NBCe1-A | ERHTSC-----             | 1035 |
| NBCe2-c | -----                   |      |
| AE2a    | -----                   |      |
| bAE3    | -----                   |      |
| eAE1    | -----                   |      |
