# Supplementary material
Source: PubMed Central journal article supplement (PMC3768104)
Supplement: 6f86118ad92b444a1d414b62ea8b2af7_II_Appendix--Non-mammalian_accession_numbers.pdf [file 6f86118ad92b444a1d414b62ea8b2af7_II_Appendix--Non-mammalian_accession_numbers.pdf]

# Appendix II

---

## Hyperlinked GenBank or Ensembl protein accession numbers for non-mammalian Slc4-like transporters (see Figures 4 and 8)

In this appendix we provide a list of GenBank or Ensembl protein accession numbers for the non-mammalian NCBI sequences referred to in the review. Each accession number is hyperlinked to its corresponding entry on the corresponding database (1).

**Table 1.** GenBank protein accession numbers for Slc4-like protein sequences represented in Figure 4.

| Species                         | Gene           | Protein Accession            |
|---------------------------------|----------------|------------------------------|
| <i>Nitrococcus mobilis</i>      | 'Nitro'        | <a href="#">ZP_01128815</a>  |
| <i>Dictyostelium discoideum</i> |                | <a href="#">XP_646790</a>    |
| <i>Ostreococcus lucimarinus</i> | Primitive (2G) | <a href="#">XP_001417272</a> |
|                                 | Primitive (7)  | <a href="#">XP_001417844</a> |
| <i>Physcomitrella patens</i>    | Primitive      | <a href="#">XP_001765760</a> |
|                                 | PpBOR1         | <a href="#">XP_001766018</a> |
|                                 | PpBOR2         | <a href="#">XP_001759676</a> |
| <i>Arabidopsis thaliana</i>     | AtBOR1         | <a href="#">NP_001078071</a> |
|                                 | AtBOR2         | <a href="#">NP_191786</a>    |
|                                 | AtBOR3         | <a href="#">NP_187296</a>    |
|                                 | AtBOR4         | <a href="#">NP_172999</a>    |
|                                 | AtBOR5         | <a href="#">NP_177619</a>    |
|                                 | AtBOR6         | <a href="#">NP_197925</a>    |
|                                 | AtBOR7         | <a href="#">NP_194977</a>    |
| <i>Oryza sativa</i>             | OsBOR1         | <a href="#">NP_001067049</a> |
|                                 | OsBOR2         | <a href="#">ABD78950</a>     |
|                                 | OsBOR3         | <a href="#">BAG92966</a>     |
|                                 | OsBOR4         | <a href="#">ABD78951</a>     |
| <i>Coprinopsis cineria</i>      |                | <a href="#">EAU85942</a>     |
| <i>Aspergillus niger</i>        | BOR-like (6G)  | <a href="#">CAK43550</a>     |
|                                 | BOR-like (14)  | <a href="#">CAK39400</a>     |
|                                 | BOR-like (23)  | <a href="#">CAL00656</a>     |

| <b>Species</b>                       | <b>Gene</b>    | <b>Protein Accession</b>                                         |
|--------------------------------------|----------------|------------------------------------------------------------------|
| <i>Saccharomyces cerevisiae</i>      | BOR1p          | <a href="#">NP_014124</a>                                        |
| <i>Suberites domuncula</i>           | NBCSA          | <a href="#">CAF32326</a>                                         |
| <i>Trichoplax adhaerens</i>          | AE-like (9)    | <a href="#">XP_002110840</a>                                     |
|                                      | AE-like (16)   | <a href="#">XP_002110841</a>                                     |
|                                      | BOR-like       | <a href="#">XP_002115332</a> and<br><a href="#">XP_002115333</a> |
| <i>Nematostella vectensis</i>        | AE-like (8)    | <a href="#">XP_001623893</a>                                     |
|                                      | AE-like (11)   | <a href="#">XP_001637907</a>                                     |
|                                      | NCBT-like (17) | <a href="#">XP_001619189</a>                                     |
|                                      | BOR-like       | <a href="#">XP_001632673</a> and<br><a href="#">XP_001632674</a> |
| <i>Caenorhabditis elegans</i>        | ABTS-1         | <a href="#">NP_492258</a>                                        |
|                                      | ABTS-2         | <a href="#">NP_509936</a>                                        |
|                                      | ABTS-3         | <a href="#">NP_001033333</a>                                     |
|                                      | ABTS-4         | <a href="#">NP_001024827</a>                                     |
| <i>Doryteuthis (Loligo) pealei</i>   | AE-like        | <a href="#">ABF06445</a>                                         |
|                                      | sqNBCe         | <a href="#">ABF06444</a>                                         |
|                                      | sqNDCBE        | <a href="#">AAN75454</a>                                         |
| <i>Drosophila melanogaster</i>       | CG8177         | <a href="#">NP_648357</a>                                        |
|                                      | NDAE1          | <a href="#">NP_523501</a>                                        |
| <i>Strongylocentrotus purpuratus</i> | AE-like (10)   | <a href="#">XP_793649</a>                                        |
|                                      | AE-like (16)   | <a href="#">XP_791964</a>                                        |
|                                      | Sp-NBC         | <a href="#">NP_001073019</a>                                     |
|                                      | NCBT-like (22) | <a href="#">XP_786033</a>                                        |
|                                      | BOR-like       | <a href="#">XP_784629</a>                                        |
| <i>Ciona intestinalis</i>            | AE-like        | <a href="#">XP_002124608</a>                                     |
|                                      | NCBT-like      | <a href="#">XP_002124093</a>                                     |
|                                      | BOR-like       | <a href="#">XP_002128564</a>                                     |

**Table 2.** GenBank or Ensembl protein accession numbers for the non-mammalian orthologs of Slc4a4, Slc4a5 and Slc4a9 that were used to generate the alignment upon which the cladogram in Figure 8 is based.

| <b>Species</b>                          | <b>Gene</b> | <b>Protein Accession</b>           |
|-----------------------------------------|-------------|------------------------------------|
| <i>Zebrafish (Danio rerio)</i>          | Slc4a4.1    | <a href="#">NP_001030156</a>       |
|                                         | Slc4a4.2    | <a href="#">XP_690120</a>          |
|                                         | Slc4a5.1    | <a href="#">XP_001921823</a>       |
|                                         | Slc4a5.2    | <a href="#">CAM14250</a>           |
| <i>Clawed Frog (Xenopus tropicalis)</i> | Slc4a4      | <a href="#">XP_002940622</a>       |
|                                         | Slc4a5      | <a href="#">XP_002933018</a>       |
|                                         | 'Slc4a9'    | <a href="#">ENSXETT00000039713</a> |
| <i>Fowl (Gallus gallus)</i>             | Slc4a4      | <a href="#">XP_420603</a>          |
|                                         | Slc4a5      | <a href="#">XP_423797</a>          |
|                                         | Slc4a9      | <a href="#">XP_001232428</a>       |

## References

1. **Sayers EW, Barrett T, Benson DA, Bolton E, Bryant SH, Canese K, Chetvernin V, Church DM, Dicuccio M, Federhen S, Feolo M, Fingerman IM, Geer LY, Helmberg W, Kapustin Y, Krasnov S, Landsman D, Lipman DJ, Lu Z, Madden TL, Madej T, Maglott DR, Marchler-Bauer A, Miller V, Karsch-Mizrachi I, Ostell J, Panchenko A, Phan L, Pruitt KD, Schuler GD, Sequeira E, Sherry ST, Shumway M, Sirotkin K, Slotta D, Souvorov A, Starchenko G, Tatusova TA, Wagner L, Wang Y, Wilbur WJ, Yaschenko E, and Ye J.** Database resources of the National Center for Biotechnology Information. *Nucleic Acids Res* 40: D13-D25, 2012.
