# Supplementary material
Source: PubMed Central journal article supplement (PMC3768104)
Supplement: 89b8ba9d3e0918f38d4f1732ed6daa81_V_Appendix--Human_NCBT_variant_protein_sequence_alignments.pdf [file 89b8ba9d3e0918f38d4f1732ed6daa81_V_Appendix--Human_NCBT_variant_protein_sequence_alignments.pdf]

# Appendix V

## Annotated protein sequence alignments of human NCBT variants (see Section V)

In this appendix we present ClustalW (1) sequence alignments of the variants of each of the five NCBTs, color coded per their diagrammatic representation in the Figures of the review. TM1 and TM14 of each variant are shown as gray boxes to mark the Nt/TMD and TMD/Ct boundaries. Sequence accessions are provided in Appendix IV.

**Alignment 1: NBCe1 variants.** An alignment of human NBCe1-A, NBCe1-B, NBCe1-C, NBCe1-D, and NBCe1-E as depicted in Figure 18 of the review. Shown are the 41-aa autostimulatory domain, the 85-aa auto inhibitory domain, the 9-aa cassette I, and the 61-aa alternative Ct that includes a PDZ-binding sequence.

```
NBCe1-A -----MSTENVEGKPSNLGER 16
NBCe1-D -----MSTENVEGKPSNLGER 16
NBCe1-B MEDEAVLDRGASFLKHVCDEEEVEGHHTIYIGVHVPKSYRRRRRHKRKTGHKKEKKEKERI 60
NBCe1-E MEDEAVLDRGASFLKHVCDEEEVEGHHTIYIGVHVPKSYRRRRRHKRKTGHKKEKKEKERI 60
NBCe1-C MEDEAVLDRGASFLKHVCDEEEVEGHHTIYIGVHVPKSYRRRRRHKRKTGHKKEKKEKERI 60
                                     . : . . : . : .

NBCe1-A GRARSSTFLRVVQPMFNHSIFTSAVSPAERIRFILGEEDDSPAPPQLFTELDELLAVDG 76
NBCe1-D GRARSSTFLRVVQPMFNHSIFTSAVSPAERIRFILGEEDDSPAPPQLFTELDELLAVDG 76
NBCe1-B SENYSDKSDIENADESSSSILKPLISPAERIRFILGEEDDSPAPPQLFTELDELLAVDG 120
NBCe1-E SENYSDKSDIENADESSSSILKPLISPAERIRFILGEEDDSPAPPQLFTELDELLAVDG 120
NBCe1-C SENYSDKSDIENADESSSSILKPLISPAERIRFILGEEDDSPAPPQLFTELDELLAVDG 120
.. *.. . **:. :*****

NBCe1-A QEMEWKETARWIKFEEKVEQGERWSKPHVATLSLHSLFELRTCMEKGSIMLDREASSLP 136
NBCe1-D QEMEWKETARWIKFEEKVEQGERWSKPHVATLSLHSLFELRTCMEKGSIMLDREASSLP 136
NBCe1-B QEMEWKETARWIKFEEKVEQGERWSKPHVATLSLHSLFELRTCMEKGSIMLDREASSLP 180
NBCe1-E QEMEWKETARWIKFEEKVEQGERWSKPHVATLSLHSLFELRTCMEKGSIMLDREASSLP 180
NBCe1-C QEMEWKETARWIKFEEKVEQGERWSKPHVATLSLHSLFELRTCMEKGSIMLDREASSLP 180
*****

NBCe1-A QLVEMIVDHIETGLLKPELKDKVITYTLRKHHRQTKKSNLRSADIGKTVSSASRMFTN 196
NBCe1-D QLVEMIVDHIETGLLKPELKDKVITYTLRKHHRQTKKSNLRSADIGKTVSSAS----- 191
NBCe1-B QLVEMIVDHIETGLLKPELKDKVITYTLRKHHRQTKKSNLRSADIGKTVSSASRMFTN 240
NBCe1-E QLVEMIVDHIETGLLKPELKDKVITYTLRKHHRQTKKSNLRSADIGKTVSSAS----- 235
NBCe1-C QLVEMIVDHIETGLLKPELKDKVITYTLRKHHRQTKKSNLRSADIGKTVSSASRMFTN 240
*****
```

NBCel-A PDNGSPAMTHRNLTSSSLNDISDKPEKDQLKNKFMKKLPRDAEASNVLVGEVDFLDTPFI 256  
 NBCel-D ----SPAMTHRNLTSSSLNDISDKPEKDQLKNKFMKKLPRDAEASNVLVGEVDFLDTPFI 247  
 NBCel-B PDNGSPAMTHRNLTSFSLNDISDKPEKDQLKNKFMKKLPRDAEASNVLVGEVDFLDTPFI 300  
 NBCel-E ----SPAMTHRNLTSFSLNDISDKPEKDQLKNKFMKKLPRDAEASNVLVGEVDFLDTPFI 291  
 NBCel-C PDNGSPAMTHRNLTSSSLNDISDKPEKDQLKNKFMKKLPRDAEASNVLVGEVDFLDTPFI 300  
 \*\*\*\*\*

NBCel-A AFVRLQQAVMLGALTEVPVTRFLFILLGPKGKAKSYHEIGRAIATLMSDEVFHDIA YKA 316  
 NBCel-D AFVRLQQAVMLGALTEVPVTRFLFILLGPKGKAKSYHEIGRAIATLMSDEVFHDIA YKA 307  
 NBCel-B AFVRLQQAVMLGALTEVPVTRFLFILLGPKGKAKSYHEIGRAIATLMSDEVFHDIA YKA 360  
 NBCel-E AFVRLQQAVMLGALTEVPVTRFLFILLGPKGKAKSYHEIGRAIATLMSDEVFHDIA YKA 351  
 NBCel-C AFVRLQQAVMLGALTEVPVTRFLFILLGPKGKAKSYHEIGRAIATLMSDEVFHDIA YKA 360  
 \*\*\*\*\*

NBCel-A KDRHDLIAGIDEFLDEVIVLPPGEWDPAIRIEPPKSLPSSDKRKNMYSGGENVQMNGDTP 376  
 NBCel-D KDRHDLIAGIDEFLDEVIVLPPGEWDPAIRIEPPKSLPSSDKRKNMYSGGENVQMNGDTP 367  
 NBCel-B KDRHDLIAGIDEFLDEVIVLPPGEWDPAIRIEPPKSLPSSDKRKNMYSGGENVQMNGDTP 420  
 NBCel-E KDRHDLIAGIDEFLDEVIVLPPGEWDPAIRIEPPKSLPSSDKRKNMYSGGENVQMNGDTP 411  
 NBCel-C KDRHDLIAGIDEFLDEVIVLPPGEWDPAIRIEPPKSLPSSDKRKNMYSGGENVQMNGDTP 420  
 \*\*\*\*\*

Nt---//---TM1

NBCel-A HDGGHGGGGHGDCEELQRTGRFCGGLIKDIKRKAPFFASDFYDALNIQALSAILFIYLAT 436  
 NBCel-D HDGGHGGGGHGDCEELQRTGRFCGGLIKDIKRKAPFFASDFYDALNIQALSAILFIYLAT 427  
 NBCel-B HDGGHGGGGHGDCEELQRTGRFCGGLIKDIKRKAPFFASDFYDALNIQALSAILFIYLAT 480  
 NBCel-E HDGGHGGGGHGDCEELQRTGRFCGGLIKDIKRKAPFFASDFYDALNIQALSAILFIYLAT 471  
 NBCel-C HDGGHGGGGHGDCEELQRTGRFCGGLIKDIKRKAPFFASDFYDALNIQALSAILFIYLAT 480  
 \*\*\*\*\*

NBCel-A VTNAITFGGLLGDATDNMQVLESFGLTAVSGAIFCLFAGQPLTILSSTGPVLVFERLLF 496  
 NBCel-D VTNAITFGGLLGDATDNMQVLESFGLTAVSGAIFCLFAGQPLTILSSTGPVLVFERLLF 487  
 NBCel-B VTNAITFGGLLGDATDNMQVLESFGLTAVSGAIFCLFAGQPLTILSSTGPVLVFERLLF 540  
 NBCel-E VTNAITFGGLLGDATDNMQVLESFGLTAVSGAIFCLFAGQPLTILSSTGPVLVFERLLF 531  
 NBCel-C VTNAITFGGLLGDATDNMQVLESFGLTAVSGAIFCLFAGQPLTILSSTGPVLVFERLLF 540  
 \*\*\*\*\*

NBCel-A NFSKDNDFDYLEFRLWIGLWSAFLCLILVATDASFLVQYFTRFTEEGFSSLISFIFIYDA 556  
 NBCel-D NFSKDNDFDYLEFRLWIGLWSAFLCLILVATDASFLVQYFTRFTEEGFSSLISFIFIYDA 547  
 NBCel-B NFSKDNDFDYLEFRLWIGLWSAFLCLILVATDASFLVQYFTRFTEEGFSSLISFIFIYDA 600  
 NBCel-E NFSKDNDFDYLEFRLWIGLWSAFLCLILVATDASFLVQYFTRFTEEGFSSLISFIFIYDA 591  
 NBCel-C NFSKDNDFDYLEFRLWIGLWSAFLCLILVATDASFLVQYFTRFTEEGFSSLISFIFIYDA 600  
 \*\*\*\*\*

NBCel-A FKKMIKLADYYPINSNFKVGYNLTFSTCVPPDPANISISNDTTLAPEYLPTMSSTD MYH 616  
 NBCel-D FKKMIKLADYYPINSNFKVGYNLTFSTCVPPDPANISISNDTTLAPEYLPTMSSTD MYH 607  
 NBCel-B FKKMIKLADYYPINSNFKVGYNLTFSTCVPPDPANISISNDTTLAPEYLPTMSSTD MYH 660  
 NBCel-E FKKMIKLADYYPINSNFKVGYNLTFSTCVPPDPANISISNDTTLAPEYLPTMSSTD MYH 651  
 NBCel-C FKKMIKLADYYPINSNFKVGYNLTFSTCVPPDPANISISNDTTLAPEYLPTMSSTD MYH 660  
 \*\*\*\*\*

NBCel-A NTTFDWAFLSKKECSKYGGNLVGNNCNFVPDITLMSFILFLGTYTSSMALKKFKTSPYFP 676  
 NBCel-D NTTFDWAFLSKKECSKYGGNLVGNNCNFVPDITLMSFILFLGTYTSSMALKKFKTSPYFP 667  
 NBCel-B NTTFDWAFLSKKECSKYGGNLVGNNCNFVPDITLMSFILFLGTYTSSMALKKFKTSPYFP 720  
 NBCel-E NTTFDWAFLSKKECSKYGGNLVGNNCNFVPDITLMSFILFLGTYTSSMALKKFKTSPYFP 711  
 NBCel-C NTTFDWAFLSKKECSKYGGNLVGNNCNFVPDITLMSFILFLGTYTSSMALKKFKTSPYFP 720  
 \*\*\*\*\*

NBCel-A TTARKLISDFAILLSILIFCVIDALVGVDTPKLI V PSEFKPTSPNRGWFVPPFGENPWWV 736  
 NBCel-D TTARKLISDFAILLSILIFCVIDALVGVDTPKLI V PSEFKPTSPNRGWFVPPFGENPWWV 727  
 NBCel-B TTARKLISDFAILLSILIFCVIDALVGVDTPKLI V PSEFKPTSPNRGWFVPPFGENPWWV 780  
 NBCel-E TTARKLISDFAILLSILIFCVIDALVGVDTPKLI V PSEFKPTSPNRGWFVPPFGENPWWV 771

NBCe1-C TTARKLISDFAILLSILIFCVIDALVGVDTPKLIVPSEFKPTSPNRGWFVPPFGENPWWV 780  
\*\*\*\*\*

NBCe1-A CLAAAIPALLVTILIFMDQQITAVIVNRKEHKLKKGAGYHLDLFWVAILMVICSLMALPW 796

NBCe1-D CLAAAIPALLVTILIFMDQQITAVIVNRKEHKLKKGAGYHLDLFWVAILMVICSLMALPW 787

NBCe1-B CLAAAIPALLVTILIFMDQQITAVIVNRKEHKLKKGAGYHLDLFWVAILMVICSLMALPW 840

NBCe1-E CLAAAIPALLVTILIFMDQQITAVIVNRKEHKLKKGAGYHLDLFWVAILMVICSLMALPW 831

NBCe1-C CLAAAIPALLVTILIFMDQQITAVIVNRKEHKLKKGAGYHLDLFWVAILMVICSLMALPW 840  
\*\*\*\*\*

NBCe1-A YVAATVISIAHIDSLKMETETSAPGEQPKFLGVREQRVTGTLVFLTGLSVFMAPILKFI 856

NBCe1-D YVAATVISIAHIDSLKMETETSAPGEQPKFLGVREQRVTGTLVFLTGLSVFMAPILKFI 847

NBCe1-B YVAATVISIAHIDSLKMETETSAPGEQPKFLGVREQRVTGTLVFLTGLSVFMAPILKFI 900

NBCe1-E YVAATVISIAHIDSLKMETETSAPGEQPKFLGVREQRVTGTLVFLTGLSVFMAPILKFI 891

NBCe1-C YVAATVISIAHIDSLKMETETSAPGEQPKFLGVREQRVTGTLVFLTGLSVFMAPILKFI 900  
\*\*\*\*\*

NBCe1-A PMPVLYGVFLYMGVASLNGVQFMDRLKLLMPLKHQPDFIYLRHVPLRRVHLFTFLQVLC 916

NBCe1-D PMPVLYGVFLYMGVASLNGVQFMDRLKLLMPLKHQPDFIYLRHVPLRRVHLFTFLQVLC 907

NBCe1-B PMPVLYGVFLYMGVASLNGVQFMDRLKLLMPLKHQPDFIYLRHVPLRRVHLFTFLQVLC 960

NBCe1-E PMPVLYGVFLYMGVASLNGVQFMDRLKLLMPLKHQPDFIYLRHVPLRRVHLFTFLQVLC 951

NBCe1-C PMPVLYGVFLYMGVASLNGVQFMDRLKLLMPLKHQPDFIYLRHVPLRRVHLFTFLQVLC 960  
\*\*\*\*\*

TM14---//---Ct

NBCe1-A LALLWILKSTVAAIIFPVMILALVAVRKGM DYLF SQHDL SFLDDVIPEKDKKKKDEK 976

NBCe1-D LALLWILKSTVAAIIFPVMILALVAVRKGM DYLF SQHDL SFLDDVIPEKDKKKKDEK 967

NBCe1-B LALLWILKSTVAAIIFPVMILALVAVRKGM DYLF SQHDL SFLDDVIPEKDKKKKDEK 1020

NBCe1-E LALLWILKSTVAAIIFPVMILALVAVRKGM DYLF SQHDL SFLDDVIPEKDKKKKDEK 1011

NBCe1-C LALLWILKSTVAAIIFPVMILALVAVRKGM DYLF SQHDL SFLDDVIPEKDKKKKDEK 1020  
\*\*\*\*\*

NBCe1-A KKKKGSLSDNDDSDCPYSEKVP SIKIPMDIMEQQPF LSDSKPSDRERSPTFLERHTSC- 1035

NBCe1-D KKKKGSLSDNDDSDCPYSEKVP SIKIPMDIMEQQPF LSDSKPSDRERSPTFLERHTSC- 1026

NBCe1-B KKKKGSLSDNDDSDCPYSEKVP SIKIPMDIMEQQPF LSDSKPSDRERSPTFLERHTSC- 1079

NBCe1-E KKKKGSLSDNDDSDCPYSEKVP SIKIPMDIMEQQPF LSDSKPSDRERSPTFLERHTSC- 1070

NBCe1-C KKKKGSLSDNDD EKD HQHSLNATHHADKIPFLQSLGMPSPRTPVKVVPQIRIELEPED 1080  
\*\*\*\*\* . . . : : : \* . : . . : : \* : . .

NBCe1-A -----

NBCe1-D -----

NBCe1-B -----

NBCe1-E -----

NBCe1-C NDYFWRSKGTETTL 1094

**Alignment 2: NBCe2 variants.** An alignment of human NBCe2-a and NBCe2-c as depicted in Figure 27 of the review. Shown is the 16-aa insert.

```

NBCe2-a      MKVKEEKAGVGKLDHTNHRRRFPDQKECPPIHIGLPVPTYPQRKTDQKGHLSGLQKVHWG 60
NBCe2-c      MKVKEEKAGVGKLDHTNHRRRFPDQKECPPIHIGLPVPTYPQRKTDQKGHLSGLQKVHWG 60
*****

NBCe2-a      LRPDQPQQELTGP GSGASSQDSSMDLISRTRSPAAEQLDILGEEDEAPNPTLFTEM DTL 120
NBCe2-c      LRPDQPQQELTGP GSGASSQDSSMDLISRTRSPAAEQLDILGEEDEAPNPTLFTEM DTL 120
*****

NBCe2-a      QHDGDQMEWKESARWIKFEEKVEEGGERWSKPHVSTLSLHSLFELRTCLQTGTVLLD LDS 180
NBCe2-c      QHDGDQMEWKESARWIKFEEKVEEGGERWSKPHVSTLSLHSLFELRTCLQTGTVLLD LDS 180
*****

NBCe2-a      GSLPQIIDDVIEKQIEDGLLRPELRERSYVLLRRHRHQTKKPIHRSLADIGKSVST TNR 240
NBCe2-c      GSLPQIIDDVIEKQIEDGLLRPELRERSYVLLRRHRHQTKKPIHRSLADIGKSVST TNR 240
*****

NBCe2-a      SPARSPGAGPSLHHSTEDLRMRQSANYGRLCHAQSRSMNDISLTPNTDQRKNKFMK KIPK 300
NBCe2-c      SPARSPGAGPSLHHSTEDLRMRQSANYGRLCHAQSRSMNDISLTPNTDQRKNKFMK KIPK 300
*****

NBCe2-a      DSEASNVLVGEVDFLDQPFIAFVRLIQSAMLGGVTEVPVPTRFLLFILLGPSGRA KSYNEI 360
NBCe2-c      DSEASNVLVGEVDFLDQPFIAFVRLIQSAMLGGVTEVPVPTRFLLFILLGPSGRA KSYNEI 360
*****

NBCe2-a      GRAIATLMVDDLFSVDVAYKARNREDLIAGIDEFLDEVIVLPPGEWDPNIRIEP PPKVPSA 420
NBCe2-c      GRAIATLMVDDLFSVDVAYKARNREDLIAGIDEFLDEVIVLPPGEWDPNIRIEP PPKVPSA 420
*****

NBCe2-a      DKRKSVFSLAELGQMNGSVGGGGGAPGGGNGGGGGGGSGGGAGSGGAGGTSSG DDGEMPA 480
NBCe2-c      DKRKSVFSLAELGQMNGSVGGGGGAPGGGNGGGGGGGSGGGAGSGGAGGTSSG DDGEMPA 480
*****

NBCe2-a      MHEIGEELIWTGRFFGGLCLDIKRKLPWFPSDFYDGFHIQSI SAILFIYLCITNAITFG 540
NBCe2-c      MHEIGEELIWTGRFFGGLCLDIKRKLPWFPSDFYDGFHIQSI SAILFIYLCITNAITFG 540
*****

NBCe2-a      GLLGDATDNYQGVME SFLGTAMAGSLFCLFSGQPLIILSSTGPILIFEKLLDF S KGNGL 600
NBCe2-c      GLLGDATDNYQGVME SFLGTAMAGSLFCLFSGQPLIILSSTGPILIFEKLLDF S KGNGL 600
*****

NBCe2-a      DYMEFRLWIGLHSAVQCLILVATDASFIIKYITRFTEEGFSTLISFIF IYDAIKKMIGAF 660
NBCe2-c      DYMEFRLWIGLHSAVQCLILVATDASFIIKYITRFTEEGFSTLISFIF IYDAIKKMIGAF 660
*****

NBCe2-a      KYYPINMDFKPNFITTYKCECVAPDVTNTVFNASAPLAPDTNASLYNLLN LNTALDWSLL 720
NBCe2-c      KYYPINMDFKPNFITTYKCECVAPDVTNTVFNASAPLAPDTNASLYNLLN LNTALDWSLL 720
*****

NBCe2-a      SKKECLSYGGRLLGN SCKFIPDLALMSFILFFGTYSMTLTLKFKFSRYFP TKVRLVAD 780
NBCe2-c      SKKECLSYGGRLLGN SCKFIPDLALMSFILFFGTYSMTLTLKFKFSRYFP TKVRLVAD 780
*****

```

```

NBCe2-a      FSIVFSILMFCGIDACFGLLETPKLVHPSVIKPTRPDRGWFVAPFGKNPWWVYPASILPAL 840
NBCe2-c      FSIVFSILMFCGIDACFGLLETPKLVHPSVIKPTRPDRGWFVAPFGKNPWWVYPASILPAL 840
*****

NBCe2-a      LVTILIFMDQQITAVIVNRKENKLLKKAAGYHLDLFWVGILMALCSFMGLPWYVAATVISI 900
NBCe2-c      LVTILIFMDQQITAVIVNRKENKLLKKAAGYHLDLFWVGILMALCSFMGLPWYVAATVISI 900
*****

                                     TM11
NBCe2-a      AHIDSLKMETETSAPGEQPQFLGVREQRVTGIIVFILTGISVFLAPILKCIPLPVLYGVF 960
NBCe2-c      AHIDSLKMETETSAPGEQPQFLGVREQRVTGIIVFILTGISVFLAPILKCIPLPVLYGVF 960
*****

LYMGVASLNGIQMGTGGSEFKIQKLLTPFWERCKLFLMPAKHQPDHAFLRHVPLRRIHLE 1020
NBCe2-a      LYMVASLNGIQ-----FWERCKLFLMPAKHQPDHAFLRHVPLRRIHLE 1004
NBCe2-c      *****

                                     TM13          TM14---//---Ct
NBCe2-a      TLVQILCLAVLWILKSTVAAIIFPVMILGLIIVRRLDFIFSQHDLAWIDNILPEKEKKE 1080
NBCe2-c      TLVQILCLAVLWILKSTVAAIIFPVMILGLIIVRRLDFIFSQHDLAWIDNILPEKEKKE 1064
*****

TDKRRKRKKGAEHDCDEEPQFPSPSVIKIPMESVQSDPQNGIHCIARKRSSWSYSL 1137
NBCe2-a      TDKRRKRKKGAEHDCDEEPQFPSPSVIKIPMESVQSDPQNGIHCIARKRSSWSYSL 1121
NBCe2-c      *****

```

**Alignment 3: NBCn1 variants.** An alignment of human NBCn1-A, NBCn1-B, NBCn1-C, NBCn1-D, and NBCn1-E as depicted in Figure 32 of the review. Shown are the alternate Nt sequences (11-aa 'MERF' vs 16-aa 'MEAD'), the 13-aa cassette I, the 124-aa cassette II, and the 36-aa cassette III. Note that the D' sequence (not depicted in Figure 32) includes an additional 4-aa sequence 'VTSR' not present in NBCn1-D.

```

NBCn1-B      MEADGAGEQMRPLLTR----GPDEEAVVDLGTKSSTVNTKFEKEEESHRAVYIGVHVPF 56
NBCn1-E      MEADGAGEQMRPLLTR----GPDEEAVVDLGTKSSTVNTKFEKEEESHRAVYIGVHVPF 56
NBCn1-A      -----MERFRLKPKLP-----GPDEEAVVDLGTKSSTVNTKFEKEEESHRAVYIGVHVPF 51
NBCn1-C      MEADGAGEQMRPLLTR----GPDEEAVVDLGTKSSTVNTKFEKEEESHRAVYIGVHVPF 56
NBCn1-D      MEADGAGEQMRPLLTR----GPDEEAVVDLGTKSSTVNTKFEKEEESHRAVYIGVHVPF 56
NBCn1-D'     MEADGAGEQMRPLLTRVTSRGPDEEAVVDLGTKSSTVNTKFEKEEESHRAVYIGVHVPF 60
                *****

NBCn1-B      SKESRRRHRHRGHKHHHRRRKDKESDKEDGRESPSYDTPSQRVQFILGTEDDDEEHI PHD 116
NBCn1-E      SKESRRRHRHRGHKHHHRRRKDKESDKEDGRESPSYDTPSQRVQFILGTEDDDEEHI PHD 116
NBCn1-A      SKESRRRHRHRGHKHHHRRRKDKESDKEDGRESPSYDTPSQRVQFILGTEDDDEEHI PHD 111
NBCn1-C      SKESRRRHRHRGHKHHHRRRKDKESDKEDGRESPSYDTPSQRVQFILGTEDDDEEHI PHD 116
NBCn1-D      SKESRRRHRHRGHKHHHRRRKDKESDKEDGRESPSYDTPSQRVQFILGTEDDDEEHI PHD 116
NBCn1-D'     SKESRRRHRHRGHKHHHRRRKDKESDKEDGRESPSYDTPSQRVQFILGTEDDDEEHI PHD 120
                *****

NBCn1-B      LFTEMDEL CYRDGEEYEWKETARWLKFEEDVEDGGDRWSKPYVATLSLHSLFELRSCILN 176
NBCn1-E      LFTEMDEL CYRDGEEYEWKETARWLKFEEDVEDGGDRWSKPYVATLSLHSLFELRSCILN 176
NBCn1-A      LFTEMDEL CYRDGEEYEWKETARWLKFEEDVEDGGDRWSKPYVATLSLHSLFELRSCILN 171
NBCn1-C      LFTEMDEL CYRDGEEYEWKETARWLKFEEDVEDGGDRWSKPYVATLSLHSLFELRSCILN 176
NBCn1-D      LFTEMDEL CYRDGEEYEWKETARWLKFEEDVEDGGDRWSKPYVATLSLHSLFELRSCILN 176
NBCn1-D'     LFTEMDEL CYRDGEEYEWKETARWLKFEEDVEDGGDRWSKPYVATLSLHSLFELRSCILN 180
                *****

NBCn1-B      GTVMLDMRASTLDEIADMVLDNMIASGQLDESIRENVREALLKRHHHQNEKRFTSRIPLV 236
NBCn1-E      GTVMLDMRASTLDEIADMVLDNMIASGQLDESIRENVREALLKRHHHQNEKRFTSRIPLV 236
NBCn1-A      GTVMLDMRASTLDEIADMVLDNMIASGQLDESIRENVREALLKRHHHQNEKRFTSRIPLV 231
NBCn1-C      GTVMLDMRASTLDEIADMVLDNMIASGQLDESIRENVREALLKRHHHQNEKRFTSRIPLV 236
NBCn1-D      GTVMLDMRASTLDEIADMVLDNMIASGQLDESIRENVREALLKRHHHQNEKRFTSRIPLV 236
NBCn1-D'     GTVMLDMRASTLDEIADMVLDNMIASGQLDESIRENVREALLKRHHHQNEKRFTSRIPLV 240
                *****

                Casette I                Casette II
NBCn1-B      RSFADIGKKHSDPHLLERNGEGLSASRHSRLRTGLSASNLSLRGESPLSLLLGHLLPSSRA 296
NBCn1-E      RSFADIGKKHSDPHLLERN----- 256
NBCn1-A      RSFADIGKKHSDPHLLERNGEGLSASRHSRLRTGLSASNLSLRGESPLSLLLGHLLPSSRA 291
NBCn1-C      RSFADI-----GEGLSASRHSRLRTGLSASNLSLRGESPLSLLLGHLLPSSRA 283
NBCn1-D      RSFADIGKKHSDPHLLERNGEGLSASRHSRLRTGLSASNLSLRGESPLSLLLGHLLPSSRA 296
NBCn1-D'     RSFADIGKKHSDPHLLERNGEGLSASRHSRLRTGLSASNLSLRGESPLSLLLGHLLPSSRA 300
                *****

```

NBCnl-B GTPAGSRCTTPVPTPQNSPPSSPSISRLLTSRSSQESQRQAPPELLVSPASDDIPTVVIHPP 356  
NBCnl-E -----  
NBCnl-A GTPAGSRCTTPVPTPQNSPPSSPSISRLLTSRSSQESQRQAPPELLVSPASDDIPTVVIHPP 351  
NBCnl-C GTPAGSRCTTPVPTPQNSPPSSPSISRLLTSRSSQKSQRQAPPELLVSPASDDIPTVVIHPP 343  
NBCnl-D GTPAGSRCTTPVPTPQNSPPSSPSISRLLTSRSSQKSQRQAPPELLVSPASDDIPTVVIHPP 356  
NBCnl-D' GTPAGSRCTTPVPTPQNSPPSSPSISRLLTSRSSQKSQRQAPPELLVSPASDDIPTVVIHPP 360

NBCnl-B EEDLEAALKGEEQKNEENVDLTPGILAS PQSAPGNLDNSKSGEIKGNSSGGSRENSTVDF 416  
NBCnl-E -----GILAS PQSAPGNLDNSKSGEIKGNSSGGSRENSTVDF 292  
NBCnl-A EEDLEAALKGEEQKNEENVDLTPGILAS PQSAPGNLDNSKSGEIKGNSSGGSRENSTVDF 411  
NBCnl-C EEDLEAALKGEEQKNEENVDLTPGILAS PQSAPGNLDNSKSGEIKGNSSGGSRENSTVDF 403  
NBCnl-D EEDLEAALKGEEQKNEENVDLTPGILAS PQSAPGNLDNSKSGEIKGNSSGGSRENSTVDF 416  
NBCnl-D' EEDLEAALKGEEQKNEENVDLTPGILAS PQSAPGNLDNSKSGEIKGNSSGGSRENSTVDF 420  
\*\*\*\*\*

NBCnl-B SKVDMNFMRK IPTGAEASNVLVGEVDFLERP I IAFVRLAPAVLLTGLTEVPVPTFRFLFLL 476  
NBCnl-E SKVDMNFMRK IPTGAEASNVLVGEVDFLERP I IAFVRLAPAVLLTGLTEVPVPTFRFLFLL 352  
NBCnl-A SKVDMNFMRK IPTGAEASNVLVGEVDFLERP I IAFVRLAPAVLLTGLTEVPVPTFRFLFLL 471  
NBCnl-C SKVDMNFMRK IPTGAEASNVLVGEVDFLERP I IAFVRLAPAVLLTGLTEVPVPTFRFLFLL 463  
NBCnl-D SKVDMNFMRK IPTGAEASNVLVGEVDFLERP I IAFVRLAPAVLLTGLTEVPVPTFRFLFLL 476  
NBCnl-D' SKVDMNFMRK IPTGAEASNVLVGEVDFLERP I IAFVRLAPAVLLTGLTEVPVPTFRFLFLL 480  
\*\*\*\*\*

NBCnl-B LGPAGKAPQYHEIGRSIATLMTDEIFHDVAYKAKDRNDLLSGIDEFLDQVTVLPPGEWDP 536  
NBCnl-E LGPAGKAPQYHEIGRSIATLMTDEIFHDVAYKAKDRNDLLSGIDEFLDQVTVLPPGEWDP 412  
NBCnl-A LGPAGKAPQYHEIGRSIATLMTDEIFHDVAYKAKDRNDLLSGIDEFLDQVTVLPPGEWDP 531  
NBCnl-C LGPAGKAPQYHEIGRSIATLMTDEIFHDVAYKAKDRNDLLSGIDEFLDQVTVLPPGEWDP 523  
NBCnl-D LGPAGKAPQYHEIGRSIATLMTDEIFHDVAYKAKDRNDLLSGIDEFLDQVTVLPPGEWDP 536  
NBCnl-D' LGPAGKAPQYHEIGRSIATLMTDEIFHDVAYKAKDRNDLLSGIDEFLDQVTVLPPGEWDP 540  
\*\*\*\*\*

NBCnl-B SIRIEPPKSVPSQEKRKIPVFHNGSTPTLGETPKEAAHHAGPELQRTGRLFGGLILDIKR 596  
NBCnl-E SIRIEPPKSVPSQEKRKIPVFHNGSTPTLGETPKEAAHHAGPELQRTGRLFGGLILDIKR 472  
NBCnl-A SIRIEPPKSVPSQEKRKIPVFHNGSTPTLGETPKEAAHHAGPELQRTGRLFGGLILDIKR 591  
NBCnl-C SIRIEPPKSVPSQEKRKIPVFHNGSTPTLGETPKEAAHHAGPELQRTGRLFGGLILDIKR 583  
NBCnl-D SIRIEPPKSVPSQEKRKIPVFHNGSTPTLGETPKEAAHHAGPELQRTGRLFGGLILDIKR 596  
NBCnl-D' SIRIEPPKSVPSQEKRKIPVFHNGSTPTLGETPKEAAHHAGPELQRTGRLFGGLILDIKR 600  
\*\*\*\*\*

Nt---/--TM1

NBCnl-B KAPFFLSDFKDALS LQCLASILFLYCACMSPVITFGGLLGEATEGRISAIESLFGASLTG 656  
NBCnl-E KAPFFLSDFKDALS LQCLASILFLYCACMSPVITFGGLLGEATEGRISAIESLFGASLTG 532  
NBCnl-A KAPFFLSDFKDALS LQCLASILFLYCACMSPVITFGGLLGEATEGRISAIESLFGASLTG 651  
NBCnl-C KAPFFLSDFKDALS LQCLASILFLYCACMSPVITFGGLLGEATEGRISAIESLFGASLTG 643  
NBCnl-D KAPFFLSDFKDALS LQCLASILFLYCACMSPVITFGGLLGEATEGRISAIESLFGASLTG 656  
NBCnl-D' KAPFFLSDFKDALS LQCLASILFLYCACMSPVITFGGLLGEATEGRISAIESLFGASLTG 660  
\*\*\*\*\*

NBCnl-B IAYSLFAGQPLTILGSTGPVLVFEKILYKFCRDYQLSYLSLRTSIGLWTSFLCIVLVATD 716  
NBCnl-E IAYSLFAGQPLTILGSTGPVLVFEKILYKFCRDYQLSYLSLRTSIGLWTSFLCIVLVATD 592  
NBCnl-A IAYSLFAGQPLTILGSTGPVLVFEKILYKFCRDYQLSYLSLRTSIGLWTSFLCIVLVATD 711  
NBCnl-C IAYSLFAGQPLTILGSTGPVLVFEKILYKFCRDYQLSYLSLRTSIGLWTSFLCIVLVATD 703  
NBCnl-D IAYSLFAGQPLTILGSTGPVLVFEKILYKFCRDYQLSYLSLRTSIGLWTSFLCIVLVATD 716  
NBCnl-D' IAYSLFAGQPLTILGSTGPVLVFEKILYKFCRDYQLSYLSLRTSIGLWTSFLCIVLVATD 720  
\*\*\*\*\*

|          |                                                                 |      |
|----------|-----------------------------------------------------------------|------|
| NBCn1-B  | ASSLVCIYITRFTEEAFAALICIIIFIYEALEKLFDLGETYAFNMHNNLDKLTYSYSCVCTEP | 776  |
| NBCn1-E  | ASSLVCIYITRFTEEAFAALICIIIFIYEALEKLFDLGETYAFNMHNNLDKLTYSYSCVCTEP | 652  |
| NBCn1-A  | ASSLVCIYITRFTEEAFAALICIIIFIYEALEKLFDLGETYAFNMHNNLDKLTYSYSCVCTEP | 771  |
| NBCn1-C  | ASSLVCIYITRFTEEAFAALICIIIFIYEALEKLFDLGETYAFNMHNNLDKLTYSYSCVCTEP | 763  |
| NBCn1-D  | ASSLVCIYITRFTEEAFAALICIIIFIYEALEKLFDLGETYAFNMHNNLDKLTYSYSCVCTEP | 776  |
| NBCn1-D' | ASSLVCIYITRFTEEAFAALICIIIFIYEALEKLFDLGETYAFNMHNNLDKLTYSYSCVCTEP | 780  |
|          | *****                                                           |      |
| NBCn1-B  | PNPSNETLAQWKKNITAHNISWRNLTVSECKKLRGVFLGSACGHHGPYIPDVLFWCVIL     | 836  |
| NBCn1-E  | PNPSNETLAQWKKNITAHNISWRNLTVSECKKLRGVFLGSACGHHGPYIPDVLFWCVIL     | 712  |
| NBCn1-A  | PNPSNETLAQWKKNITAHNISWRNLTVSECKKLRGVFLGSACGHHGPYIPDVLFWCVIL     | 831  |
| NBCn1-C  | PNPSNETLAQWKKNITAHNISWRNLTVSECKKLRGVFLGSACGHHGPYIPDVLFWCVIL     | 823  |
| NBCn1-D  | PNPSNETLAQWKKNITAHNISWRNLTVSECKKLRGVFLGSACGHHGPYIPDVLFWCVIL     | 836  |
| NBCn1-D' | PNPSNETLAQWKKNITAHNISWRNLTVSECKKLRGVFLGSACGHHGPYIPDVLFWCVIL     | 840  |
|          | *****                                                           |      |
| NBCn1-B  | FFTTFFLSSFLKQFKTKRYFPTKVRSTISDFAVFLTIVIMVTIDYLVGVSPKLVHVEKGF    | 896  |
| NBCn1-E  | FFTTFFLSSFLKQFKTKRYFPTKVRSTISDFAVFLTIVIMVTIDYLVGVSPKLVHVEKGF    | 772  |
| NBCn1-A  | FFTTFFLSSFLKQFKTKRYFPTKVRSTISDFAVFLTIVIMVTIDYLVGVSPKLVHVEKGF    | 891  |
| NBCn1-C  | FFTTFFLSSFLKQFKTKRYFPTKVRSTISDFAVFLTIVIMVTIDYLVGVSPKLVHVEKGF    | 883  |
| NBCn1-D  | FFTTFFLSSFLKQFKTKRYFPTKVRSTISDFAVFLTIVIMVTIDYLVGVSPKLVHVEKGF    | 896  |
| NBCn1-D' | FFTTFFLSSFLKQFKTKRYFPTKVRSTISDFAVFLTIVIMVTIDYLVGVSPKLVHVEKGF    | 900  |
|          | *****                                                           |      |
| NBCn1-B  | EPTHPERGWIISPLGDNPWWTLLIAAIPALLCTILIFMDQQITAVIINRKEHKLKKGAGY    | 956  |
| NBCn1-E  | EPTHPERGWIISPLGDNPWWTLLIAAIPALLCTILIFMDQQITAVIINRKEHKLKKGAGY    | 832  |
| NBCn1-A  | EPTHPERGWIISPLGDNPWWTLLIAAIPALLCTILIFMDQQITAVIINRKEHKLKKGAGY    | 951  |
| NBCn1-C  | EPTHPERGWIISPLGDNPWWTLLIAAIPALLCTILIFMDQQITAVIINRKEHKLKKGAGY    | 943  |
| NBCn1-D  | EPTHPERGWIISPLGDNPWWTLLIAAIPALLCTILIFMDQQITAVIINRKEHKLKKGAGY    | 956  |
| NBCn1-D' | EPTHPERGWIISPLGDNPWWTLLIAAIPALLCTILIFMDQQITAVIINRKEHKLKKGAGY    | 960  |
|          | *****                                                           |      |
| NBCn1-B  | HLDLLMVGVMGLGVCSVMGLPWVFAATVLSISHVNSLKVSECSAPGEQPKFLGIREQVRT    | 1016 |
| NBCn1-E  | HLDLLMVGVMGLGVCSVMGLPWVFAATVLSISHVNSLKVSECSAPGEQPKFLGIREQVRT    | 892  |
| NBCn1-A  | HLDLLMVGVMGLGVCSVMGLPWVFAATVLSISHVNSLKVSECSAPGEQPKFLGIREQVRT    | 1011 |
| NBCn1-C  | HLDLLMVGVMGLGVCSVMGLPWVFAATVLSISHVNSLKVSECSAPGEQPKFLGIREQVRT    | 1003 |
| NBCn1-D  | HLDLLMVGVMGLGVCSVMGLPWVFAATVLSISHVNSLKVSECSAPGEQPKFLGIREQVRT    | 1016 |
| NBCn1-D' | HLDLLMVGVMGLGVCSVMGLPWVFAATVLSISHVNSLKVSECSAPGEQPKFLGIREQVRT    | 1020 |
|          | *****                                                           |      |
| NBCn1-B  | GLMIFILMGLSVFMTSVLKFIPMPVLYGVFLYMGVSSLKGIQLFDRIKLFGMPAKHQPD     | 1076 |
| NBCn1-E  | GLMIFILMGLSVFMTSVLKFIPMPVLYGVFLYMGVSSLKGIQLFDRIKLFGMPAKHQPD     | 952  |
| NBCn1-A  | GLMIFILMGLSVFMTSVLKFIPMPVLYGVFLYMGVSSLKGIQLFDRIKLFGMPAKHQPD     | 1071 |
| NBCn1-C  | GLMIFILMGLSVFMTSVLKFIPMPVLYGVFLYMGVSSLKGIQLFDRIKLFGMPAKHQPD     | 1063 |
| NBCn1-D  | GLMIFILMGLSVFMTSVLKFIPMPVLYGVFLYMGVSSLKGIQLFDRIKLFGMPAKHQPD     | 1076 |
| NBCn1-D' | GLMIFILMGLSVFMTSVLKFIPMPVLYGVFLYMGVSSLKGIQLFDRIKLFGMPAKHQPD     | 1080 |
|          | *****                                                           |      |
|          | TM14---//---Ct                                                  |      |
| NBCn1-B  | IYLRVPLWKVHIIFTVIQLTCLVLLWVIKVSAAAVVFPMMVLALVFVRKLMDLCTFKREL    | 1136 |
| NBCn1-E  | IYLRVPLWKVHIIFTVIQLTCLVLLWVIKVSAAAVVFPMMVLALVFVRKLMDLCTFKREL    | 1012 |
| NBCn1-A  | IYLRVPLWKVHIIFTVIQLTCLVLLWVIKVSAAAVVFPMMVLALVFVRKLMDLCTFKREL    | 1131 |
| NBCn1-C  | IYLRVPLWKVHIIFTVIQLTCLVLLWVIKVSAAAVVFPMMVLALVFVRKLMDLCTFKREL    | 1123 |
| NBCn1-D  | IYLRVPLWKVHIIFTVIQLTCLVLLWVIKVSAAAVVFPMMVLALVFVRKLMDLCTFKREL    | 1136 |
| NBCn1-D' | IYLRVPLWKVHIIFTVIQLTCLVLLWVIKVSAAAVVFPMMVLALVFVRKLMDLCTFKREL    | 1140 |
|          | *****                                                           |      |



|          |                                                              |          |
|----------|--------------------------------------------------------------|----------|
| NBCnl-B  | SWLDDLMPESKKKKEDDKKKKEKEEAERMLQDDDDTVHLPFEGGSLLQIPVKALKYS--- | 1192     |
| NBCnl-E  | SWLDDLMPESKKKKEDDKKKKEKEEAERMLQDDDDTVHLPFEGGSLLQIPVKALKYS--- | 1068     |
| NBCnl-A  | SWLDDLMPESKKKKEDDKKKKEKEEAERMLQDDDDTVHLPFEGGSLLQIPVKALKYS--- | 1187     |
| NBCnl-C  | SWLDDLMPESKKKKEDDKKKKEKEEAERMLQDDDDTVHLPFEGGSLLQIPVKALKYS    | VDP 1183 |
| NBCnl-D  | SWLDDLMPESKKKKEDDKKKKEKEEAERMLQDDDDTVHLPFEGGSLLQIPVKALKYS    | VDP 1196 |
| NBCnl-D' | SWLDDLMPESKKKKEDDKKKKEKEEAERMLQDDDDTVHLPFEGGSLLQIPVKALKYS    | VDP 1200 |

\*\*\*\*\*

Cassette III

|          |                                                             |      |
|----------|-------------------------------------------------------------|------|
| NBCnl-B  | -----PDKPVSVKISFEDEPRKKYVDAETSL                             | 1219 |
| NBCnl-E  | -----PDKPVSVKISFEDEPRKKYVDAETSL                             | 1095 |
| NBCnl-A  | -----PDKPVSVKISFEDEPRKKYVDAETSL                             | 1214 |
| NBCnl-C  | SIVNISDEMAKTAQWKALSMNTENAKVTRSNMSPDKPVSVKISFEDEPRKKYVDAETSL | 1242 |
| NBCnl-D  | SIVNISDEMAKTAQWKALSMNTENAKVTRSNMSPDKPVSVKISFEDEPRKKYVDAETSL | 1255 |
| NBCnl-D' | SIVNISDEMAKTAQWKALSMNTENAKVTRSNMSPDKPVSVKISFEDEPRKKYVDAETSL | 1259 |

\*\*\*\*\*

**Alignment 4: NDCBE variants.** An alignment of human NDCBE-A, NDCBE-B, NDCBE-C, and NDCBE-D as depicted in Figure 37 of the review. Shown are the alternate Nt appendages (red vs purple) and the alternative long and short Ct that includes an auto inhibitory domain. Only the Nt appendage of NDCBE-E is included in this alignment, the remainder of the protein is identical to NDCBE-B.

|         |                                                                  |     |
|---------|------------------------------------------------------------------|-----|
| NDCBE-E | MFNKNNSNKL RSTPRYRRGDPGYLNFTELGLPKPEQKDQWSQH                     | 43  |
| NDCBE-B | MPAAGSNEPDGVL SYQRPDEEAVVDQGGTSTILNIHYEKEELEGHRTL YVGV RMP LGRQS | 60  |
| NDCBE-D | -----MPLGRQS                                                     | 7   |
| NDCBE-A | MPAAGSNEPDGVL SYQRPDEEAVVDQGGTSTILNIHYEKEELEGHRTL YVGV RMP LGRQS | 60  |
| NDCBE-C | -----MPLGRQS                                                     | 7   |
|         | *****                                                            |     |
| NDCBE-B | HRHHRTHGQKHRRRGRGKGASQGEEGLEALAHDTPSQRVQFILGTEEDEEHVPHELFTTEL    | 120 |
| NDCBE-D | HRHHRTHGQKHRRRGRGKGASQGEEGLEALAHDTPSQRVQFILGTEEDEEHVPHELFTTEL    | 67  |
| NDCBE-A | HRHHRTHGQKHRRRGRGKGASQGEEGLEALAHDTPSQRVQFILGTEEDEEHVPHELFTTEL    | 120 |
| NDCBE-C | HRHHRTHGQKHRRRGRGKGASQGEEGLEALAHDTPSQRVQFILGTEEDEEHVPHELFTTEL    | 67  |
|         | *****                                                            |     |
| NDCBE-B | DEICMKEGEDAEWKETARWLKFEEDVEDGGERWSKPYVATLSLHSLFELRSCLINGTVLL     | 180 |
| NDCBE-D | DEICMKEGEDAEWKETARWLKFEEDVEDGGERWSKPYVATLSLHSLFELRSCLINGTVLL     | 127 |
| NDCBE-A | DEICMKEGEDAEWKETARWLKFEEDVEDGGERWSKPYVATLSLHSLFELRSCLINGTVLL     | 180 |
| NDCBE-C | DEICMKEGEDAEWKETARWLKFEEDVEDGGERWSKPYVATLSLHSLFELRSCLINGTVLL     | 127 |
|         | *****                                                            |     |
| NDCBE-B | DMHANSIEEISDLILDQQELSSDLNDSMRVKVREALLKKHHHQNEKKRNLIPIVRSFAE      | 240 |
| NDCBE-D | DMHANSIEEISDLILDQQELSSDLNDSMRVKVREALLKKHHHQNEKKRNLIPIVRSFAE      | 187 |
| NDCBE-A | DMHANSIEEISDLILDQQELSSDLNDSMRVKVREALLKKHHHQNEKKRNLIPIVRSFAE      | 240 |
| NDCBE-C | DMHANSIEEISDLILDQQELSSDLNDSMRVKVREALLKKHHHQNEKKRNLIPIVRSFAE      | 187 |
|         | *****                                                            |     |
| NDCBE-B | VGKKQSDPHLMDKHGQTVSPQSVPTTNLEVKNGVNCESHPVDLSKVDLHFMKKIPTGAEA     | 300 |
| NDCBE-D | VGKKQSDPHLMDKHGQTVSPQSVPTTNLEVKNGVNCESHPVDLSKVDLHFMKKIPTGAEA     | 247 |
| NDCBE-A | VGKKQSDPHLMDKHGQTVSPQSVPTTNLEVKNGVNCESHPVDLSKVDLHFMKKIPTGAEA     | 300 |
| NDCBE-C | VGKKQSDPHLMDKHGQTVSPQSVPTTNLEVKNGVNCESHPVDLSKVDLHFMKKIPTGAEA     | 247 |
|         | *****                                                            |     |
| NDCBE-B | SNVLVGEVDILDRPIVAFVRLSPAVLLSGLTEVPIPTRFLFILLGPVKGQQYHEIGRSM      | 360 |
| NDCBE-D | SNVLVGEVDILDRPIVAFVRLSPAVLLSGLTEVPIPTRFLFILLGPVKGQQYHEIGRSM      | 307 |
| NDCBE-A | SNVLVGEVDILDRPIVAFVRLSPAVLLSGLTEVPIPTRFLFILLGPVKGQQYHEIGRSM      | 360 |
| NDCBE-C | SNVLVGEVDILDRPIVAFVRLSPAVLLSGLTEVPIPTRFLFILLGPVKGQQYHEIGRSM      | 307 |
|         | *****                                                            |     |
| NDCBE-B | ATIMTDEIFHDVAYKAKERDDLLAGIDEFLDQVTVLPPGEWDPSIRIEPPKNVPSQEKRK     | 420 |
| NDCBE-D | ATIMTDEIFHDVAYKAKERDDLLAGIDEFLDQVTVLPPGEWDPSIRIEPPKNVPSQEKRK     | 367 |
| NDCBE-A | ATIMTDEIFHDVAYKAKERDDLLAGIDEFLDQVTVLPPGEWDPSIRIEPPKNVPSQEKRK     | 420 |
| NDCBE-C | ATIMTDEIFHDVAYKAKERDDLLAGIDEFLDQVTVLPPGEWDPSIRIEPPKNVPSQEKRK     | 367 |
|         | *****                                                            |     |
|         | Nt---//---TM1                                                    |     |
| NDCBE-B | MPGVPNGNVCHIEQEPHGGHSGPELQRTGRLFGGLVLDIKRKAPWYSDYRDALSQCLA       | 480 |
| NDCBE-D | MPGVPNGNVCHIEQEPHGGHSGPELQRTGRLFGGLVLDIKRKAPWYSDYRDALSQCLA       | 427 |
| NDCBE-A | MPGVPNGNVCHIEQEPHGGHSGPELQRTGRLFGGLVLDIKRKAPWYSDYRDALSQCLA       | 480 |
| NDCBE-C | MPGVPNGNVCHIEQEPHGGHSGPELQRTGRLFGGLVLDIKRKAPWYSDYRDALSQCLA       | 427 |
|         | *****                                                            |     |
| NDCBE-B | SFLFLYCACMSPVITFGGLLGEATEGRISAIESLFGASMTGAIYSLFAGQALTILGSTGP     | 540 |
| NDCBE-D | SFLFLYCACMSPVITFGGLLGEATEGRISAIESLFGASMTGAIYSLFAGQALTILGSTGP     | 487 |
| NDCBE-A | SFLFLYCACMSPVITFGGLLGEATEGRISAIESLFGASMTGAIYSLFAGQALTILGSTGP     | 540 |
| NDCBE-C | SFLFLYCACMSPVITFGGLLGEATEGRISAIESLFGASMTGAIYSLFAGQALTILGSTGP     | 487 |
|         | *****                                                            |     |

NDCBE-B VLVFEKILFKFCKDYALSYSLRACIGLWTAFLCIVLVATDASSLVCYITRFTEEFASL 600  
NDCBE-D VLVFEKILFKFCKDYALSYSLRACIGLWTAFLCIVLVATDASSLVCYITRFTEEFASL 547  
NDCBE-A VLVFEKILFKFCKDYALSYSLRACIGLWTAFLCIVLVATDASSLVCYITRFTEEFASL 600  
NDCBE-C VLVFEKILFKFCKDYALSYSLRACIGLWTAFLCIVLVATDASSLVCYITRFTEEFASL 547  
\*\*\*\*\*

NDCBE-B ICIFIYEAEIekliHLAETYP IHMSQLDHLsLYYCRCTLPENPNNHtLQYWKDHNIvTA 660  
NDCBE-D ICIFIYEAEIekliHLAETYP IHMSQLDHLsLYYCRCTLPENPNNHtLQYWKDHNIvTA 607  
NDCBE-A ICIFIYEAEIekliHLAETYP IHMSQLDHLsLYYCRCTLPENPNNHtLQYWKDHNIvTA 660  
NDCBE-C ICIFIYEAEIekliHLAETYP IHMSQLDHLsLYYCRCTLPENPNNHtLQYWKDHNIvTA 607  
\*\*\*\*\*

NDCBE-B EVHWANLTVSECQEMHGFEFMSACGHHGPyTPDVLFWSCILFFTTFILSSTLkTFkTSRY 720  
NDCBE-D EVHWANLTVSECQEMHGFEFMSACGHHGPyTPDVLFWSCILFFTTFILSSTLkTFkTSRY 667  
NDCBE-A EVHWANLTVSECQEMHGFEFMSACGHHGPyTPDVLFWSCILFFTTFILSSTLkTFkTSRY 720  
NDCBE-C EVHWANLTVSECQEMHGFEFMSACGHHGPyTPDVLFWSCILFFTTFILSSTLkTFkTSRY 667  
\*\*\*\*\*

NDCBE-B FPTRVRSMVSDFAVFLTIFTMVIIDFLIGVSPKlQVPSVfKpTRDDRGWIINPIGPNPw 780  
NDCBE-D FPTRVRSMVSDFAVFLTIFTMVIIDFLIGVSPKlQVPSVfKpTRDDRGWIINPIGPNPw 727  
NDCBE-A FPTRVRSMVSDFAVFLTIFTMVIIDFLIGVSPKlQVPSVfKpTRDDRGWIINPIGPNPw 780  
NDCBE-C FPTRVRSMVSDFAVFLTIFTMVIIDFLIGVSPKlQVPSVfKpTRDDRGWIINPIGPNPw 727  
\*\*\*\*\*

NDCBE-B WTVIAAIIpALLctILIFMDQqITAVIINrKEHKLKkGCGYHLDLLMVAIMLGVCsIMGL 840  
NDCBE-D WTVIAAIIpALLctILIFMDQqITAVIINrKEHKLKkGCGYHLDLLMVAIMLGVCsIMGL 787  
NDCBE-A WTVIAAIIpALLctILIFMDQqITAVIINrKEHKLKkGCGYHLDLLMVAIMLGVCsIMGL 840  
NDCBE-C WTVIAAIIpALLctILIFMDQqITAVIINrKEHKLKkGCGYHLDLLMVAIMLGVCsIMGL 787  
\*\*\*\*\*

NDCBE-B PWFVAATVLSITHVNSLkLESECSAPGEQPKfLGIREQRVTGLMIFVLMGCsVFMTAILK 900  
NDCBE-D PWFVAATVLSITHVNSLkLESECSAPGEQPKfLGIREQRVTGLMIFVLMGCsVFMTAILK 847  
NDCBE-A PWFVAATVLSITHVNSLkLESECSAPGEQPKfLGIREQRVTGLMIFVLMGCsVFMTAILK 900  
NDCBE-C PWFVAATVLSITHVNSLkLESECSAPGEQPKfLGIREQRVTGLMIFVLMGCsVFMTAILK 847  
\*\*\*\*\*

NDCBE-B FIPMPVLYGVFLYMGVSSlQGIQFFDRlKlFGMPAKHQPDFIYLRHVPLRkVHLFTLIQl 960  
NDCBE-D FIPMPVLYGVFLYMGVSSlQGIQFFDRlKlFGMPAKHQPDFIYLRHVPLRkVHLFTLIQl 907  
NDCBE-A FIPMPVLYGVFLYMGVSSlQGIQFFDRlKlFGMPAKHQPDFIYLRHVPLRkVHLFTLIQl 960  
NDCBE-C FIPMPVLYGVFLYMGVSSlQGIQFFDRlKlFGMPAKHQPDFIYLRHVPLRkVHLFTLIQl 907  
\*\*\*\*\*

TM14---//---Ct

NDCBE-B TCLVLLWVIKASPAAIVFPMMVLALVFVRKVMdLcFSKRELSWLDdLMPESKkKkLDDAK 1020  
NDCBE-D TCLVLLWVIKASPAAIVFPMMVLALVFVRKVMdLcFSKRELSWLDdLMPESKkKkLDDAK 967  
NDCBE-A TCLVLLWVIKASPAAIVFPMMVLALVFVRKVMdLcFSKRELSWLDdLMPESKkKkLDDAK 1020  
NDCBE-C TCLVLLWVIKASPAAIVFPMMVLALVFVRKVMdLcFSKRELSWLDdLMPESKkKkLDDAK 967  
\*\*\*\*\*

NDCBE-B KKAKEEEVIVLAPTVYLgASNYRT----- 1044  
NDCBE-D KKAKEEEVIVLAPTVYLgASNYRT----- 991  
NDCBE-A KKAKEEEeAEKMLEIGGDKfPLESRKLLSSPGKNISCRCDPSEINISDEMPKTTVWKALS 1080  
NDCBE-C KKAKEEEeAEKMLEIGGDKfPLESRKLLSSPGKNISCRCDPSEINISDEMPKTTVWKALS 1027  
\*\*\*\*\* : . . :

NDCBE-B -----  
NDCBE-D -----  
NDCBE-A MNSGNAKEKSLFN 1093  
NDCBE-C MNSGNAKEKSLFN 1040

**Alignment 4: NBCn2 variants.** An alignment of human NBCn2-A, NBCn2-B, NBCn2-C, and NBCn2-D as depicted in Figure 40 of the review. Shown are the 30-aa cassette A and the alternative short and long Ct that includes a PDZ-protein binding motif. Note that the C-termini of human NBCn2-C and -D sequences are derived from an EST sequence ([CD102396](#)) as the full-length variants have not been cloned from human cDNA. Only the C-terminal sequence of rb3NCBE (emboldened) is included in this alignment.

```

NBCn2-B      MEIKDQGAQMEPLLPTRNDEEAVVDRGGTRSILKTHFEKEDLEGHRTLFIGVHVPLGGRK 60
NBCn2-D      MEIKDQGAQMEPLLPTRNDEEAVVDRGGTRSILKTHFEKEDLEGHRTLFIGVHVPLGGRK 60
NBCn2-A      MEIKDQGAQMEPLLPTRNDEEAVVDRGGTRSILKTHFEKEDLEGHRTLFIGVHVPLGGRK 60
NBCn2-C      MEIKDQGAQMEPLLPTRNDEEAVVDRGGTRSILKTHFEKEDLEGHRTLFIGVHVPLGGRK 60
*****

NBCn2-B      SHRRHRHRGHKHKRKRDRERDSGLEDGRESFSFDTSPQRVQFILGTEDDDEEHIPHDLFTE 120
NBCn2-D      SHRRHRHRGHKHKRKRDRERDSGLEDGRESFSFDTSPQRVQFILGTEDDDEEHIPHDLFTE 120
NBCn2-A      SHRRHRHRGHKHKRKRDRERDSGLEDGRESFSFDTSPQRVQFILGTEDDDEEHIPHDLFTE 120
NBCn2-C      SHRRHRHRGHKHKRKRDRERDSGLEDGRESFSFDTSPQRVQFILGTEDDDEEHIPHDLFTE 120
*****

NBCn2-B      LDEICWREGEDAWEWRETARWLKFEEDVEDGGERWSKPYVATLSLHSLFELRSCILNGTVL 180
NBCn2-D      LDEICWREGEDAWEWRETARWLKFEEDVEDGGERWSKPYVATLSLHSLFELRSCILNGTVL 180
NBCn2-A      LDEICWREGEDAWEWRETARWLKFEEDVEDGGERWSKPYVATLSLHSLFELRSCILNGTVL 180
NBCn2-C      LDEICWREGEDAWEWRETARWLKFEEDVEDGGERWSKPYVATLSLHSLFELRSCILNGTVL 180
*****

NBCn2-B      LDMHANTLEEIADMVLDQQVSSGQLNEDVRHRVHEALMKQHHHQKQKLTNRIPIVRSFA 240
NBCn2-D      LDMHANTLEEIADMVLDQQVSSGQLNEDVRHRVHEALMKQHHHQKQKLTNRIPIVRSFA 240
NBCn2-A      LDMHANTLEEIADMVLDQQVSSGQLNEDVRHRVHEALMKQHHHQKQKLTNRIPIVRSFA 240
NBCn2-C      LDMHANTLEEIADMVLDQQVSSGQLNEDVRHRVHEALMKQHHHQKQKLTNRIPIVRSFA 240
*****

NBCn2-B      DIGKKQSEPNMSMDKNAGQVVSPPQSAPACVENKNDVSRENSTVDFSKGLGGQQKGHTSPCG 300
NBCn2-D      DIGKKQSEPNMSMDKNAGQVVSPPQSAPACVENKNDVSRENSTVDFSKGLGGQQKGHTSPCG 300
NBCn2-A      DIGKKQSEPNMSMDKNAGQVVSPPQSAPACVENKNDVSRENSTVDFSK----- 286
NBCn2-C      DIGKKQSEPNMSMDKNAGQVVSPPQSAPACVENKNDVSRENSTVDFSK----- 286
*****

NBCn2-B      MKQRHEKGPPHQQEREVDLHFMKKIPPGAEASNILVGELEFLDRTVVAFVRLSPAVLLQG 360
NBCn2-D      MKQRHEKGPPHQQEREVDLHFMKKIPPGAEASNILVGELEFLDRTVVAFVRLSPAVLLQG 360
NBCn2-A      -----VDLHFMKKIPPGAEASNILVGELEFLDRTVVAFVRLSPAVLLQG 330
NBCn2-C      -----VDLHFMKKIPPGAEASNILVGELEFLDRTVVAFVRLSPAVLLQG 330
*****

NBCn2-B      LAEVPIPTRFLFILLGPLGKGQQYHEIGRSIATLMTDEVFHDVAYKAKDRNDLVSGIDEF 420
NBCn2-D      LAEVPIPTRFLFILLGPLGKGQQYHEIGRSIATLMTDEVFHDVAYKAKDRNDLVSGIDEF 420
NBCn2-A      LAEVPIPTRFLFILLGPLGKGQQYHEIGRSIATLMTDEVFHDVAYKAKDRNDLVSGIDEF 390
NBCn2-C      LAEVPIPTRFLFILLGPLGKGQQYHEIGRSIATLMTDEVFHDVAYKAKDRNDLVSGIDEF 390
*****

NBCn2-B      LDQVTVLPPGEWDPSIRIEPPKNVPSQEKRKIPAVPNGTAAHGAEAPHGGHSGPELQRTG 480
NBCn2-D      LDQVTVLPPGEWDPSIRIEPPKNVPSQEKRKIPAVPNGTAAHGAEAPHGGHSGPELQRTG 480
NBCn2-A      LDQVTVLPPGEWDPSIRIEPPKNVPSQEKRKIPAVPNGTAAHGAEAPHGGHSGPELQRTG 450
NBCn2-C      LDQVTVLPPGEWDPSIRIEPPKNVPSQEKRKIPAVPNGTAAHGAEAPHGGHSGPELQRTG 450
*****

```

Nt---//---TM1

NBCn2-B RIFGGLILDIKRKAPYFWSDFRDAFSLQCLASFLFLYCACMSPVITFGGLLGEATEGRIS 540  
NBCn2-D RIFGGLILDIKRKAPYFWSDFRDAFSLQCLASFLFLYCACMSPVITFGGLLGEATEGRIS 540  
NBCn2-A RIFGGLILDIKRKAPYFWSDFRDAFSLQCLASFLFLYCACMSPVITFGGLLGEATEGRIS 510  
NBCn2-C RIFGGLILDIKRKAPYFWSDFRDAFSLQCLASFLFLYCACMSPVITFGGLLGEATEGRIS 510

\*\*\*\*\*

NBCn2-B AIESLFGASMTGIAYSLFGGQPLTILGSTGPVLFVFEKILFKFCKEYGLSYLSLRASIGLW 600  
NBCn2-D AIESLFGASMTGIAYSLFGGQPLTILGSTGPVLFVFEKILFKFCKEYGLSYLSLRASIGLW 600  
NBCn2-A AIESLFGASMTGIAYSLFGGQPLTILGSTGPVLFVFEKILFKFCKEYGLSYLSLRASIGLW 570  
NBCn2-C AIESLFGASMTGIAYSLFGGQPLTILGSTGPVLFVFEKILFKFCKEYGLSYLSLRASIGLW 570

\*\*\*\*\*

NBCn2-B TATLCIILVATDASSLVCYITRFTEEFASLICIIFIYEALEKLFELSEAYPINMHNDLE 660  
NBCn2-D TATLCIILVATDASSLVCYITRFTEEFASLICIIFIYEALEKLFELSEAYPINMHNDLE 660  
NBCn2-A TATLCIILVATDASSLVCYITRFTEEFASLICIIFIYEALEKLFELSEAYPINMHNDLE 630  
NBCn2-C TATLCIILVATDASSLVCYITRFTEEFASLICIIFIYEALEKLFELSEAYPINMHNDLE 630

\*\*\*\*\*

NBCn2-B LLTQYSCNCVEPHNPSNGTLKEWRESNISASDIIWENLTVSECKSLHGEYVGRACGHDP 720  
NBCn2-D LLTQYSCNCVEPHNPSNGTLKEWRESNISASDIIWENLTVSECKSLHGEYVGRACGHDP 720  
NBCn2-A LLTQYSCNCVEPHNPSNGTLKEWRESNISASDIIWENLTVSECKSLHGEYVGRACGHDP 690  
NBCn2-C LLTQYSCNCVEPHNPSNGTLKEWRESNISASDIIWENLTVSECKSLHGEYVGRACGHDP 690

\*\*\*\*\*

NBCn2-B YVPDVLFWSVILFFSTVTLSATLKQFKTSRYFPKTVRSIVSDFAVFLTILCMVLIDYAIG 780  
NBCn2-D YVPDVLFWSVILFFSTVTLSATLKQFKTSRYFPKTVRSIVSDFAVFLTILCMVLIDYAIG 780  
NBCn2-A YVPDVLFWSVILFFSTVTLSATLKQFKTSRYFPKTVRSIVSDFAVFLTILCMVLIDYAIG 750  
NBCn2-C YVPDVLFWSVILFFSTVTLSATLKQFKTSRYFPKTVRSIVSDFAVFLTILCMVLIDYAIG 750

\*\*\*\*\*

NBCn2-B IPSPKLQVPSVFKPTRDRRGWFVTPGLPNPWWTVIAAIIIPALLCTILIFMDQQITAVIIN 840  
NBCn2-D IPSPKLQVPSVFKPTRDRRGWFVTPGLPNPWWTVIAAIIIPALLCTILIFMDQQITAVIIN 840  
NBCn2-A IPSPKLQVPSVFKPTRDRRGWFVTPGLPNPWWTVIAAIIIPALLCTILIFMDQQITAVIIN 810  
NBCn2-C IPSPKLQVPSVFKPTRDRRGWFVTPGLPNPWWTVIAAIIIPALLCTILIFMDQQITAVIIN 810

\*\*\*\*\*

NBCn2-B RKEHKLKKGCGYHLDLLMVAVMLGVCSIMGLPWFVAATVLSITHVNSLKESECSAPGEQ 900  
NBCn2-D RKEHKLKKGCGYHLDLLMVAVMLGVCSIMGLPWFVAATVLSITHVNSLKESECSAPGEQ 900  
NBCn2-A RKEHKLKKGCGYHLDLLMVAVMLGVCSIMGLPWFVAATVLSITHVNSLKESECSAPGEQ 870  
NBCn2-C RKEHKLKKGCGYHLDLLMVAVMLGVCSIMGLPWFVAATVLSITHVNSLKESECSAPGEQ 870

\*\*\*\*\*

NBCn2-B PKFLGIREQRVTGLMIFILMGSSVFMTSILKFIIPMPVLYGVFLYMGASSLKGIQFFDRIK 960  
NBCn2-D PKFLGIREQRVTGLMIFILMGSSVFMTSILKFIIPMPVLYGVFLYMGASSLKGIQFFDRIK 960  
NBCn2-A PKFLGIREQRVTGLMIFILMGSSVFMTSILKFIIPMPVLYGVFLYMGASSLKGIQFFDRIK 930  
NBCn2-C PKFLGIREQRVTGLMIFILMGSSVFMTSILKFIIPMPVLYGVFLYMGASSLKGIQFFDRIK 930

\*\*\*\*\*

NBCn2-B LFWMPAKHQPDFIYLRHVPLRKVHLFTIIQMSCLGLLWIKVSRAAIVFPMMLVLAIVFVR 1020  
NBCn2-D LFWMPAKHQPDFIYLRHVPLRKVHLFTIIQMSCLGLLWIKVSRAAIVFPMMLVLAIVFVR 1020  
NBCn2-A LFWMPAKHQPDFIYLRHVPLRKVHLFTIIQMSCLGLLWIKVSRAAIVFPMMLVLAIVFVR 990  
NBCn2-C LFWMPAKHQPDFIYLRHVPLRKVHLFTIIQMSCLGLLWIKVSRAAIVFPMMLVLAIVFVR 990

\*\*\*\*\*

TM14---//---Ct

NBCn2-B KLMDLLFTKRELSWLDDLMPESKSKKKLEDAEKEEEQSMLAMEDEGTVQLPLEGHYRDDPS 1080  
NBCn2-D KLMDLLFTKRELSWLDDLMPESKSKKKLEDAEKEEEQSMLAMEDEGTVQLPLEGHYRDDPS 1080  
NBCn2-A KLMDLLFTKRELSWLDDLMPESKSKKKLEDAEKEEEQSMLAMEDEGTVQLPLEGHYRDDPS 1050  
NBCn2-C KLMDLLFTKRELSWLDDLMPESKSKKKLEDAEKEEEQSMLAMEDEGTVQLPLEGHYRDDPS 1050  
**rb3NCBE KLMDFLFTKRELSWLDDLMPESKSKKKLEDAEKEH 1054**  
\*\*\*\*\*:\*\*\*\*\*

NBCn2-B VINISDEMSKTALWRNLLITADNSKDKESSFPSKSPS----- 1118  
NBCn2-D VINISDEMSKTALWRNLLITADNSKDKESSFPSKIESRKEKKADSGKGVRETCL 1136  
NBCn2-A VINISDEMSKTALWRNLLITADNSKDKESSFPSKSPS----- 1088  
NBCn2-C VINISDEMSKTALWRNLLITADNSKDKESSFPSKIESRKEKKADSGKGVRETCL 1106  
\*\*\*\*\* \* \*

## References

1. Chenna R, Sugawara H, Koike T, Lopez R, Gibson TJ, Higgins DG, and Thompson JD. Multiple sequence alignment with the Clustal series of programs. *Nucleic Acids Res* 31: 3497-3500, 2003.
