# Supplementary material
Source: PubMed Central journal article supplement (PMC3768104)
Supplement: 362f512c0647259c704bd6c9478aaee0_VI_Appendix--EST_distributions.pdf [file 362f512c0647259c704bd6c9478aaee0_VI_Appendix--EST_distributions.pdf]

# Appendix VI

## The distribution of expressed sequence tags for human and mouse NCBTs, AE4, and BTR1 (see Sections V and VI)

The National Institutes of Health curate a database of the origins of deposited ESTs that provide an impression of the distributions of diverse genes within the human and mouse body (2). In **Table 1**, we reproduce the EST distribution data for all five human NCBTs plus AE4 and BTR1. In **Table 2**, we reproduce the EST distribution data for all five mouse NCBTs plus AE4 and BTR1. These data complement the distribution of NCBTs that has been disclosed by investigators in the field (e.g., Table 5 of the review) and suggest novel sites of NCBT expression. Blank cells indicate that there no EST sequences have been deposited for that SLC4 from that tissue/organ, but does not indicate the absence of SLC4 expression in that location. Note, for example, the lack of deposited NBCe2 ESTs from liver preparations, a site of abundant NBCe2 immunoreactivity (1).

**Table 1: The distribution of NCBT (plus AE4 and BTR1) ESTs amplified from human cDNAs.** For each tissue/organ, the table shows the number of ESTs isolated for each SLC4, as well as the total number of ESTs isolated from that source.

|                   | NBCe1 | NBCe2 | NBCn1 | NDCBE | NBCn2 | AE4 | BTR1 |  | total   |
|-------------------|-------|-------|-------|-------|-------|-----|------|--|---------|
| adipose tissue    |       |       | 2     |       |       |     |      |  | 12865   |
| adrenal gland     |       |       |       | 2     |       |     |      |  | 32921   |
| ascites           |       |       | 1     |       |       |     | 3    |  | 39829   |
| bladder           | 2     |       |       |       |       |     |      |  | 29856   |
| blood             |       |       | 1     | 2     |       |     | 6    |  | 122262  |
| bone marrow       |       |       | 1     | 1     |       |     |      |  | 71609   |
| bone marrow       | 1     |       |       | 2     |       |     |      |  | 48711   |
| brain             | 57    | 10    | 14    | 39    | 35    |     | 9    |  | 1092524 |
| cervix            |       | 1     | 1     |       |       |     |      |  | 48469   |
| connective tissue | 1     |       | 3     |       |       |     |      |  | 149048  |
| ear               |       |       |       |       |       |     |      |  | 16098   |
| embryonic tissue  |       | 2     | 12    | 5     |       |     | 3    |  | 212847  |
| esophagus         |       |       |       |       |       |     |      |  | 20152   |
| eye               | 3     | 4     |       |       | 2     |     | 7    |  | 208810  |
| heart             | 1     |       | 1     |       |       |     |      |  | 89512   |
| intestine         | 7     |       | 7     |       |       |     | 2    |  | 232030  |
| kidney            | 61    | 3     | 4     | 1     |       | 13  | 1    |  | 210738  |
| larynx            |       |       | 1     |       |       |     |      |  | 23489   |
| liver             | 19    |       | 6     |       |       |     |      |  | 205232  |

|                 | NBCe1 | NBCe2 | NBCn1 | NDCBE | NBCn2 | AE4 | BTR1 |  | total  |
|-----------------|-------|-------|-------|-------|-------|-----|------|--|--------|
| lung            | 3     | 1     | 7     | 1     | 2     | 1   | 6    |  | 334751 |
| lymph           |       |       | 1     |       |       |     |      |  | 44292  |
| lymph node      |       | 1     |       | 1     | 1     |     |      |  | 89697  |
| mammary gland   |       | 2     | 4     | 28    |       |     |      |  | 151228 |
| mouth           |       | 1     | 1     |       |       |     | 5    |  | 66139  |
| muscle          | 2     |       | 12    | 2     |       |     |      |  | 106323 |
| nerve           | 1     |       | 1     | 2     |       |     |      |  | 15526  |
| ovary           | 2     |       | 2     | 7     |       |     | 6    |  | 101482 |
| pancreas        | 30    | 4     |       | 7     | 4     |     | 1    |  | 213410 |
| parathyroid     |       | 1     |       |       |       |     |      |  | 20579  |
| pharynx         |       |       |       |       |       |     |      |  | 40762  |
| pituitary gland |       |       |       |       |       |     |      |  | 16521  |
| placenta        |       |       | 4     |       |       |     |      |  | 282968 |
| prostate        | 52    | 1     | 3     |       |       |     | 2    |  | 189585 |
| salivary gland  |       |       |       |       |       |     |      |  | 20264  |
| skin            | 2     |       | 2     |       |       |     | 1    |  | 210718 |
| spleen          | 2     |       |       | 2     |       |     |      |  | 53365  |
| stomach         | 14    |       | 3     |       |       |     |      |  | 95775  |
| testis          |       | 8     | 14    | 30    | 1     | 2   |      |  | 327305 |
| thymus          |       |       | 5     | 1     |       |     |      |  | 79668  |
| thyroid         | 1     | 6     | 2     |       |       |     |      |  | 46584  |
| tonsil          |       |       |       |       |       |     |      |  | 17016  |
| trachea         | 1     |       | 3     | 1     |       |     | 1    |  | 51769  |
| umbilical cord  |       |       |       |       |       |     |      |  | 13764  |
| uterus          |       | 1     | 6     |       |       |     | 1    |  | 232051 |
| vascular        | 2     |       | 2     |       |       |     |      |  | 51637  |

**Table 2: The distribution of NCBT (plus AE4 and BTR1) ESTs amplified from mouse cDNAs.**

|                       | NBCe1 | NBCe2 | NBCn1 | NDCBE | NCBE/NBCn2 | AE4 | BTR1 |  | total  |
|-----------------------|-------|-------|-------|-------|------------|-----|------|--|--------|
| adipose tissue        |       |       |       |       |            |     |      |  | 1564   |
| adrenal gland         | 1     |       |       |       |            |     |      |  | 2044   |
| bladder               | 2     |       | 6     | 1     |            |     |      |  | 13461  |
| blood                 | 1     |       | 1     | 1     |            |     |      |  | 16832  |
| bone                  |       |       | 4     |       |            |     |      |  | 32327  |
| bone marrow           |       |       | 14    |       |            |     | 1    |  | 137491 |
| brain                 | 44    | 8     | 25    | 49    | 48         |     | 2    |  | 459991 |
| connective tissue     |       |       |       |       |            |     |      |  | 19790  |
| dorsal root ganglion  | 1     |       | 2     | 3     |            |     |      |  | 10186  |
| embryonic tissue      | 6     | 18    | 28    | 11    | 5          | 5   | 34   |  | 664846 |
| epididymis            |       |       |       | 1     |            |     |      |  | 2652   |
| extraembryonic tissue |       | 2     |       | 2     |            |     |      |  | 73200  |
| eye                   | 10    | 24    | 33    | 12    | 17         |     | 4    |  | 184900 |
| fertilized ovum       |       |       | 2     | 2     |            |     |      |  | 26353  |
| heart                 | 2     |       | 2     |       |            |     |      |  | 52131  |
| inner ear             |       |       |       |       |            |     | 153  |  | 37947  |
| intestine             | 1     |       | 3     |       |            |     |      |  | 84236  |
| joint                 |       |       |       |       |            |     | 1    |  | 17136  |
| kidney                | 90    | 1     |       |       |            | 18  | 8    |  | 122453 |
| liver                 | 9     |       | 1     |       |            | 2   | 2    |  | 108957 |
| lung                  |       |       | 7     |       |            |     | 1    |  | 96442  |
| lymph node            |       |       |       |       |            |     |      |  | 15170  |
| mammary gland         | 6     |       | 21    | 2     |            |     | 4    |  | 302624 |
| molar                 |       |       | 2     |       |            |     |      |  | 3601   |
| muscle                | 1     |       | 3     |       |            |     |      |  | 27256  |
| nasopharynx           | 3     |       |       | 1     |            |     |      |  | 8067   |
| olfactory mucosa      |       |       |       |       |            |     | 3    |  | 3281   |
| ovary                 | 1     | 1     | 13    | 4     |            |     |      |  | 53434  |
| oviduct               |       |       | 1     |       |            |     |      |  | 3201   |
| pancreas              |       |       | 11    |       | 2          |     |      |  | 105756 |



## References

1. **Abuladze N, Pushkin A, Tatishchev S, Newman D, Sassani P, and Kurtz I.** Expression and localization of rat NBC4c in liver and renal uroepithelium. *Am J Physiol Cell Physiol*, 2004.
2. **Sayers EW, Barrett T, Benson DA, Bolton E, Bryant SH, Canese K, Chetvernin V, Church DM, Dicuccio M, Federhen S, Feolo M, Fingerman IM, Geer LY, Helmberg W, Kapustin Y, Krasnov S, Landsman D, Lipman DJ, Lu Z, Madden TL, Madej T, Maglott DR, Marchler-Bauer A, Miller V, Karsch-Mizrachi I, Ostell J, Panchenko A, Phan L, Pruitt KD, Schuler GD, Sequeira E, Sherry ST, Shumway M, Sirotkin K, Slotta D, Souvorov A, Starchenko G, Tatusova TA, Wagner L, Wang Y, Wilbur WJ, Yaschenko E, and Ye J.** Database resources of the National Center for Biotechnology Information. *Nucleic Acids Res* 40: D13-D25, 2012.
