# Supplementary material
Source: PubMed Central journal article supplement (PMC3768104)
Supplement: 50925a9d45480ac9f0b68df51eae66b8_IV_Appendix--Mammalian_accession_numbers.pdf [file 50925a9d45480ac9f0b68df51eae66b8_IV_Appendix--Mammalian_accession_numbers.pdf]

# Appendix IV

---

## Hyperlinked GenBank protein accession numbers for mammalian Slc4 variants (see Sections V and VI)

In this appendix we provide a list of GenBank protein accession numbers for the mammalian NCBT sequences referred to in the review. Each accession number is hyperlinked to its corresponding entry on the NCBI database (1). Not all variants have been cloned from all species.

**Table 1.** GenBank protein accession numbers for NBCe1 variants.

| Gene  | Variant | Species                  | Protein                      | Comments |
|-------|---------|--------------------------|------------------------------|----------|
| NBCe1 | A       | Human                    | <a href="#">AAC51645</a>     |          |
|       |         | Mouse                    | <a href="#">ADM25849</a>     |          |
|       |         | Rat                      | <a href="#">AAC40034</a>     |          |
|       | B       | Human                    | <a href="#">NP_001091954</a> |          |
|       |         | Mouse                    | <a href="#">NP_061230</a>    |          |
|       |         | Rat                      | <a href="#">AAF87553</a>     |          |
|       | C       | Human                    | <a href="#">ABQ43327</a>     |          |
|       |         | Mouse                    | <a href="#">NP_001129732</a> |          |
|       |         | Rat                      | <a href="#">AAF87312</a>     |          |
| D     | Human   |                          | Not deposited                |          |
|       | Mouse   | <a href="#">ADP37962</a> |                              |          |
|       | Possum  | <a href="#">ABW70835</a> |                              |          |
|       | Rat     |                          | Not deposited                |          |
| E     | Human   |                          | Not deposited                |          |
|       | Mouse   | <a href="#">ADN95183</a> |                              |          |
|       | Possum  | <a href="#">ABV79903</a> |                              |          |
|       | Rat     |                          | Not deposited                |          |

**Table 2.** GenBank protein accession numbers for NBCe2 variants. Of the six variants, only NBCe2-a and NBCe2-c have been reproducibly cloned from multiple sources. Only At present accession numbers are not available for NBCe2-a from mouse or rat.

| <b>Gene</b> | <b>Variant</b> | <b>Species</b> | <b>Protein</b>               | <b>Comments</b>                                          |
|-------------|----------------|----------------|------------------------------|----------------------------------------------------------|
| NBCe2       | a              | Human          | <a href="#">NP_067019</a>    |                                                          |
|             |                | Mouse          |                              | Not deposited                                            |
|             |                | Rat            |                              | Not deposited                                            |
|             | b              | Human          | <a href="#">NP_201580</a>    | Includes sequence that disrupts TM14                     |
|             | c              | Human          | <a href="#">AAK97072</a>     |                                                          |
|             |                | Mouse          | <a href="#">NP_001159539</a> |                                                          |
|             |                | Rat            | <a href="#">AAS98674</a>     |                                                          |
|             | d              | Human          | <a href="#">AAK97073</a>     | Lacks sequence that encodes critical transmembrane spans |
|             | e              | Human          | <a href="#">AAL48291</a>     | Probable cloning artifact                                |
|             | f              | Human          | <a href="#">AAL50802</a>     | Probable cloning artifact                                |

**Table 3.** GenBank protein accession numbers for NBCn1 variants. Sequence variants designated with a prime differ from those without a prime designation by the inclusion of four amino acids ‘VTSR’ before the second exon (see sequence alignment in Appendix V).

| Gene  | Variant | Species | Protein                                             | Comments                                                        |
|-------|---------|---------|-----------------------------------------------------|-----------------------------------------------------------------|
| NBCn1 | A       | Human   | <a href="#">NP_003606</a>                           |                                                                 |
|       |         | Mouse   | <a href="#">AFR46595</a>                            |                                                                 |
|       |         | Rat     |                                                     | Not deposited                                                   |
|       | B       | Human   |                                                     | Not deposited                                                   |
|       |         | Mouse   | <a href="#">AFR46591</a>                            |                                                                 |
|       |         | Rat     | <a href="#">AAD46389</a>                            |                                                                 |
|       | C       | Human   |                                                     | C' version: <a href="#">ACH61962</a><br>(annotated as NBCn1-C)  |
|       |         | Mouse   | <a href="#">AFR46592</a>                            |                                                                 |
|       |         | Rat     | <a href="#">AAF14345</a>                            |                                                                 |
|       | D       | Human   |                                                     | D' version: <a href="#">ACH61960</a><br>(annotated as NBCn1-D)  |
|       |         | Mouse   | <a href="#">AFR46593</a>                            |                                                                 |
|       |         | Rat     | <a href="#">NP_478118</a>                           |                                                                 |
|       | E       | Human   | <a href="#">ACH61961</a>                            |                                                                 |
|       |         | Mouse   | <a href="#">ADC92005</a>                            |                                                                 |
|       |         | Rat     |                                                     | Not deposited                                                   |
|       | F       | Human   | <a href="#">NP_001245309</a>                        |                                                                 |
|       |         | Mouse   |                                                     | Not deposited                                                   |
|       |         | Rat     |                                                     | Not deposited                                                   |
|       | G       | Human   | <a href="#">NP_001245308</a>                        |                                                                 |
|       |         | Mouse   | <a href="#">AEY79769</a>                            |                                                                 |
|       |         | Rat     |                                                     | Not deposited                                                   |
|       | H       | Human   | <a href="#">ACH61958</a><br>(annotated as NBCn1-Ha) | H' version: <a href="#">ACH61959</a><br>(annotated as NBCn1-Hb) |
|       |         | Mouse   | <a href="#">AFR46594</a>                            |                                                                 |
|       |         | Rat     |                                                     | Not deposited                                                   |
|       | I       | Mouse   | <a href="#">ADC92004</a>                            |                                                                 |
|       | J       | Mouse   | <a href="#">ADO51787</a>                            |                                                                 |
|       | K       | Mouse   | <a href="#">ADO51788</a>                            |                                                                 |
|       | L       | Mouse   | <a href="#">AFB82586</a>                            |                                                                 |

**Table 4.** GenBank protein accession numbers for NDCBE variants.

| <b>Gene</b> | <b>Variant</b> | <b>Species</b> | <b>Protein</b>            | <b>Comments</b> |
|-------------|----------------|----------------|---------------------------|-----------------|
| NDCBE       | A              | Human          | <a href="#">AAY79176</a>  |                 |
|             |                | Mouse          | <a href="#">NP_067505</a> |                 |
|             |                | Rat            |                           | Not deposited   |
|             | B              | Human          | <a href="#">NP_004849</a> |                 |
|             |                | Mouse          |                           | Not deposited   |
|             |                | Rat            |                           | Not deposited   |
|             | C              | Human          | <a href="#">ABJ09587</a>  |                 |
|             |                | Mouse          |                           | Not deposited   |
|             |                | Rat            | <a href="#">EDL85922</a>  |                 |
|             | D              | Human          | <a href="#">ABJ91577</a>  |                 |
|             |                | Mouse          |                           | Not deposited   |
|             |                | Rat            |                           | Not deposited   |
|             | E              | Human          | <a href="#">BAA34459</a>  |                 |

**Table 5.** GenBank protein accession numbers for NBCn2 variants.

| <b>Gene</b> | <b>Variant</b> | <b>Species</b> | <b>Protein</b>               | <b>Comments</b> |
|-------------|----------------|----------------|------------------------------|-----------------|
| NBCn2       | A              | Human          | <a href="#">NP_071341</a>    |                 |
|             |                | Mouse          | <a href="#">NP_001229310</a> |                 |
|             |                | Rat            | <a href="#">AAS89264</a>     | rb5NCBE         |
|             | B              | Human          | <a href="#">AAQ83632</a>     |                 |
|             |                | Mouse          | <a href="#">NP_001229309</a> |                 |
|             |                | Rat            | <a href="#">AAO59640</a>     | rb1NCBE         |
|             | C              | Human          |                              | Not deposited   |
|             |                | Mouse          | <a href="#">NP_001229308</a> |                 |
|             |                | Rat            | <a href="#">AAS89263</a>     | rb4NCBE         |
|             | D              | Human          |                              | Not deposited   |
|             |                | Mouse          | <a href="#">NP_001229307</a> |                 |
|             |                | Rat            | <a href="#">AAO59639</a>     | rb2NCBE         |
|             | rb3            | Rat            | <a href="#">AAS89262</a>     |                 |

Two other variants only described in rats are rb6NCBE ([AAS89265](#)), which is unlikely to encode a functional transporter and rb7NCBE ([AAS89266](#)) which, if not a target for nonsense mediated decay, is predicted to encode an isolated Nt.

**Table 6.** GenBank protein accession numbers for select NCBT-related protein variants that are discussed in the review.

| <b>Gene</b> | <b>Variant</b> | <b>Species</b> | <b>Protein</b>               | <b>Comments</b>         |
|-------------|----------------|----------------|------------------------------|-------------------------|
| AE1         | e              | Human          | <a href="#">NP_000333</a>    |                         |
|             |                | Mouse          | <a href="#">NP_035533</a>    |                         |
|             |                | Rat            | <a href="#">P23562</a>       |                         |
|             | k              | Human          |                              | Not deposited           |
|             |                | Mouse          |                              | Not deposited           |
|             |                | Rat            | <a href="#">AAH85748</a>     |                         |
| AE2         | a              | Human          | <a href="#">NP_001186621</a> |                         |
|             |                | Mouse          | <a href="#">NP_033233</a>    |                         |
|             |                | Rat            | <a href="#">P23347</a>       |                         |
|             | b1             | Human          | <a href="#">NP_001186623</a> |                         |
|             |                | Mouse          | <a href="#">AAG23156</a>     |                         |
|             |                | Rat            |                              | Not deposited           |
|             | b2             | Human          | <a href="#">NP_001186622</a> |                         |
|             |                | Mouse          | <a href="#">AAG23155</a>     |                         |
|             |                | Rat            |                              | Not deposited           |
|             | c1             | Mouse          | <a href="#">AAG23157</a>     | Rodent-specific variant |
|             |                | Rat            | <a href="#">EDL99360</a>     |                         |
|             |                | Mouse          | <a href="#">AAG23158</a>     | Mouse-specific variant  |
| AE3         | b              | Human          | <a href="#">NP_005061</a>    |                         |
|             |                | Mouse          | <a href="#">NP_033234</a>    |                         |
|             |                | Rat            | <a href="#">P23348</a>       |                         |
| AE4         | c              | Mouse          | <a href="#">AAG25583</a>     |                         |
|             |                | Human          | <a href="#">NP_113655</a>    |                         |
|             |                | Mouse          | <a href="#">EDK97160</a>     |                         |
| BTR1        | a              | Human          | <a href="#">NP_114423</a>    |                         |
|             |                | Human          | <a href="#">NP_001167561</a> |                         |
|             |                | Human          | <a href="#">NP_001167560</a> |                         |
|             | Not a, b, or c | Mouse          | <a href="#">NP_001074631</a> |                         |
|             | Not a, b, or c | Rat            | <a href="#">NP_001101245</a> |                         |

## References

1. **Sayers EW, Barrett T, Benson DA, Bolton E, Bryant SH, Canese K, Chetvernin V, Church DM, Dicuccio M, Federhen S, Feolo M, Fingerman IM, Geer LY, Helmberg W, Kapustin Y, Krasnov S, Landsman D, Lipman DJ, Lu Z, Madden TL, Madej T, Maglott DR, Marchler-Bauer A, Miller V, Karsch-Mizrachi I, Ostell J, Panchenko A, Phan L, Pruitt KD, Schuler GD, Sequeira E, Sherry ST, Shumway M, Sirotkin K, Slotta D, Souvorov A, Starchenko G, Tatusova TA, Wagner L, Wang Y, Wilbur WJ, Yaschenko E, and Ye J.** Database resources of the National Center for Biotechnology Information. *Nucleic Acids Res* 40: D13-D25, 2012.
