# Supplementary material
Source: PubMed Central journal article supplement (PMC3768104)

# Appendix III

## Analysis of conserved exon boundaries among human *SLC4* and *Ciona Slc4*-like genes (see Figure 7)

Sequence alignment of human SLC4s and *Ciona Slc4*-like proteins in the region of TM7-14. GenBank accession numbers are provided in Appendices II and III.

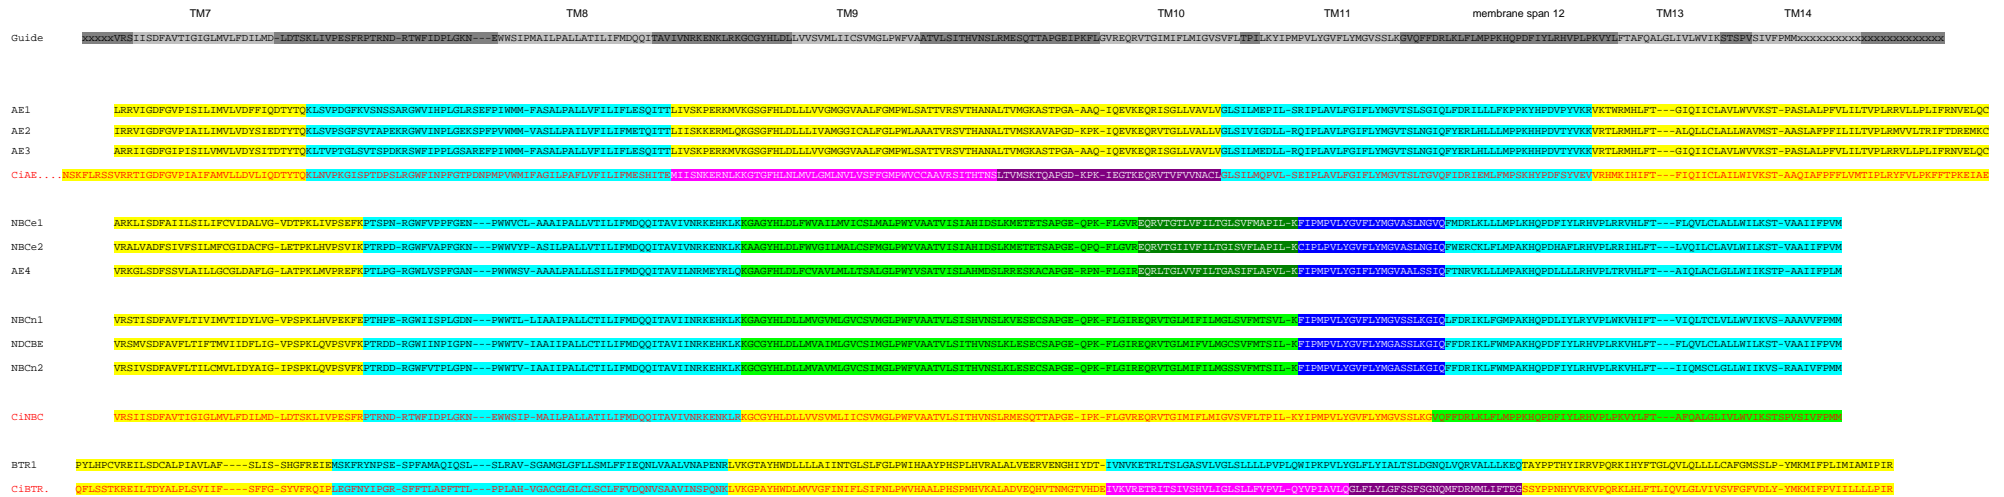

Supplement: dc70fb57d18857bb36b29d367bdb1f37_III_Appendix--Ciona_and_human_exon_boundaries.pdf [file dc70fb57d18857bb36b29d367bdb1f37_III_Appendix--Ciona_and_human_exon_boundaries.pdf]
